# 1 **Apelin signaling dependent endocardial protrusions promote cardiac trabeculation in** 2 **zebrafish**

3 Jialing Qi<sup>1</sup>, Annegret Rittershaus<sup>3</sup>, Rashmi Priya<sup>1,2</sup>, Shivani Mansingh<sup>1</sup>, Didier Y.R. Stainier<sup>1\*</sup>, Christian  
4 S.M. Helker<sup>1,3,4\*</sup>

5 <sup>1</sup>Department of Developmental Genetics, Max Planck Institute for Heart and Lung Research, 61231  
6 Bad Nauheim, Germany

7 <sup>2</sup>Present address:

8 RP: The Francis Crick Institute, Organ Morphodynamics Laboratory, London NW1 1AT, UK

9 <sup>3</sup>Present address:

10 CSMH: Philipps-University Marburg, Faculty of Biology, Cell Signaling and Dynamics, 35043 Marburg,  
11 Germany

12 <sup>4</sup>Lead contact

13 \*Correspondence: [christian.helker@biologie.uni-marburg.de](mailto:christian.helker@biologie.uni-marburg.de), [didier.stainier@mpi-bn.mpg.de](mailto:didier.stainier@mpi-bn.mpg.de)

## 14 **Abstract**

15 During cardiac development, endocardial cells (EdCs) produce growth factors to promote myocardial  
16 morphogenesis and growth. In particular, EdCs produce Neuregulin which is required for ventricular  
17 cardiomyocytes (CMs) to seed the multicellular ridges known as trabeculae. Defects in Neuregulin  
18 signaling, or in endocardial sprouting towards CMs, cause hypotrabeulation. However, the  
19 mechanisms underlying endocardial sprouting remain largely unknown. Here, we first show by live  
20 imaging in zebrafish embryos that EdCs interact with CMs via dynamic membrane protrusions. After  
21 touching CMs, these protrusions remain in close contact with their target despite the vigorous  
22 cardiac contractions. Loss of the CM-derived peptide Apelin, or of the Apelin receptor, which is  
23 expressed in EdCs, leads to reduced endocardial sprouting and hypotrabeulation. Mechanistically,  
24 Neuregulin signaling requires endocardial protrusions to activate extracellular signal-regulated kinase  
25 (Erk) signaling in CMs and trigger their delamination. Altogether, these data show that Apelin  
26 signaling dependent endocardial protrusions modulate CM behavior during trabeculation.

## 27 **Introduction**

28 To meet the needs of the growing embryo, the vertebrate heart has to undergo a series of complex  
29 morphogenetic events to transform from a linear tube into a mature organ. During trabeculation,  
30 CMs in the outer curvature of the ventricles delaminate towards the lumen to form multicellular  
31 sponge-like projections, called cardiac trabeculae (Sedmera and Thomas, 1996; Sedmera et al., 2000;  
32 Stankunas et al., 2008; Liu et al., 2010; Peshkovsky et al., 2011; Staudt et al., 2014). Cardiac

33 trabeculae are crucial to achieve increased contractility as well as for the formation of the  
34 conduction system. Trabeculation defects are often associated with left ventricular noncompaction  
35 (Oechslin et al., 2000; Claudia and Josef, 2004), embryonic heart failure, and lethality (Gassmann et  
36 al., 1995; Lee et al., 1995; Lai et al., 2010; Liu et al., 2010; Rasouli and Stainier, 2017).

37 In zebrafish, as in other vertebrates, the early embryonic heart consists of two monolayers of cells,  
38 the myocardium and the endocardium, that are separated by a layer of extracellular matrix (ECM)  
39 termed the cardiac jelly (CJ) (Stainier and Fishman, 1992; Brutsaert et al., 1996). Recently, it has  
40 been shown that EdCs, similar to blood endothelial cells (ECs), form sprouts, which are mostly  
41 oriented towards the myocardium (Del Monte-Nieto et al., 2018). During sprouting angiogenesis,  
42 ECs first extend filopodia to sense the microenvironment for growth factors, then they migrate into  
43 avascular areas and form new blood vessels (Gerhardt et al., 2003). Due to its similarity to sprouting  
44 angiogenesis, the sprouting of EdCs has been termed endocardial sprouting. However, whether  
45 endocardial sprouting is regulated by the same signaling pathways as sprouting angiogenesis is not  
46 known.

47 Multiple signaling pathways have been implicated in cardiac trabeculation, including neuregulin  
48 (Nrg)/ErbB signaling. Mouse and zebrafish embryos lacking the endocardium derived ligand Nrg or  
49 the ErbB receptor, which is expressed by the myocardium, fail to form trabeculae (Gassmann et al.,  
50 1995; Lee et al., 1995; Meyer and Birchmeier, 1995; Lai et al., 2010; Liu et al., 2010; Rasouli and  
51 Stainier, 2017). Furthermore, endocardial Notch signaling (Grego-Bessa et al., 2007; D'Amato et al.,  
52 2016; Del Monte-Nieto et al., 2018), angiopoietin 1/Tie2 signaling (Suri et al., 1996; Tachibana et al.,  
53 2005; Qu et al., 2019), and semaphorin 3E (Sema3E)/plexinD1 signaling (Sandireddy et al., 2019) are  
54 required for cardiac trabeculation in mouse. Of note, genetic deletion of the relevant receptors in  
55 the endocardium results in attenuated endocardial sprouting (Qu et al., 2019) and trabeculation  
56 defects (Grego-Bessa et al., 2007; D'Amato et al., 2016; Del Monte-Nieto et al., 2018; Qu et al., 2019;  
57 Sandireddy et al., 2019).

58 Cells communicate by a variety of mechanisms including paracrine and contact dependent signaling.  
59 More recently, a novel mechanism of cell communication by active transport of signaling molecules  
60 through filopodia-like actin rich membrane protrusions, also known as cytonemes, has been shown  
61 in different models including *Drosophila* (Ramirez-Weber and Kornberg, 1999; Roy et al., 2011;  
62 Huang et al., 2019), chick (Sanders et al., 2013), zebrafish (Stanganello et al., 2015), and mouse  
63 (Fierro-Gonzalez et al., 2013). Like filopodia, cytonemes depend on actin polymerization by various  
64 effector proteins including formins, profilin and IRSp53, a substrate for the insulin receptor (Rottner  
65 et al., 2017).

66 In this study, we take advantage of the zebrafish model, as its transparency allows single-cell  
67 resolution and high-speed imaging of the beating heart, to analyze endocardial-myocardial  
68 communication during embryogenesis. By investigating *apelin* (*apln*) mutants, we found that  
69 endocardial protrusion formation is controlled by Apln signaling. We also observed by *in vivo*  
70 imaging that endocardial protrusions promote cardiac trabeculation by modulating Nrg/ErbB/Erk  
71 signaling. Altogether, our results provide new insights into the role of endocardial protrusion during  
72 cardiac trabeculation.

## 73 **Results:**

### 74 **Endocardial-myocardial interactions in zebrafish**

75 The early embryonic heart is composed of two cell types: endocardial cells and myocardial cells; and  
76 in zebrafish, myocardial cells initially form a monolayer (Figure 1A-D). In order to analyze possible  
77 interactions between the endocardial and myocardial cells, we genetically labeled the actin  
78 cytoskeleton of the endocardium using the *TgBAC(cdh5:Gal4ff)* and *Tg(UAS:LIFEACT-GFP)* lines, and  
79 the membrane of cardiomyocytes with mCherry using the *Tg(myf7:mCherry-CAAX)* line. We  
80 observed endocardial protrusions extending towards the myocardium at 24 (Figure 1A-A'') and 48  
81 (Figure 1B-B'', Figure 1-figure supplement 1A) hpf. Of note, we observed more endocardial  
82 protrusions in the ventricle than in the atrium at 48, 60 and 72 hpf (Figure 1-figure supplement 1B).  
83 Subsequently, these ventricular endocardial protrusions formed anchor points with the myocardium  
84 which according to similar observations in mouse (Del Monte-Nieto et al., 2018) we refer to as  
85 touchdowns (Figure 1B-B''). Notably, these touchdowns are stable even during cardiac contractions  
86 (Figure 1E-H, Figure 1-video 1). Starting at around 60 hpf, CMs delaminate from the compact layer  
87 towards the lumen to seed the trabecular layer (Figure 1C, C', and C'''), as reported before (Liu et al.,  
88 2010; Staudt et al., 2014; Priya et al., 2020). We observed that endocardial protrusions appear to  
89 extend along the delaminating CMs (Figure 1C'' and C''', Figure 1-video 2). Next, trabecular CMs start  
90 to assemble into trabecular units, which consist of several trabecular CMs, starting at 72 hpf (Figure  
91 1D, D', and D'''). At this time point, we noticed that endocardial protrusions can be detected in close  
92 proximity to trabecular CMs (Figure 1D'' and D''', Figure 1-video 3). Recently, it has been shown that  
93 endothelial protrusions modulate neurogenesis by affecting progenitor proliferation in the  
94 developing brain (Di Marco et al., 2020). To determine whether endocardial protrusions affect CM  
95 proliferation, we performed EdU labeling between 28 and 72 hpf and analyzed the heart at 72 hpf.  
96 We observed that 54% of EdU positive CMs (total n=24) were in close proximity to endocardial  
97 protrusions (Figure 1-figure supplement 2) indicating that endocardial protrusions may modulate CM  
98 proliferation.

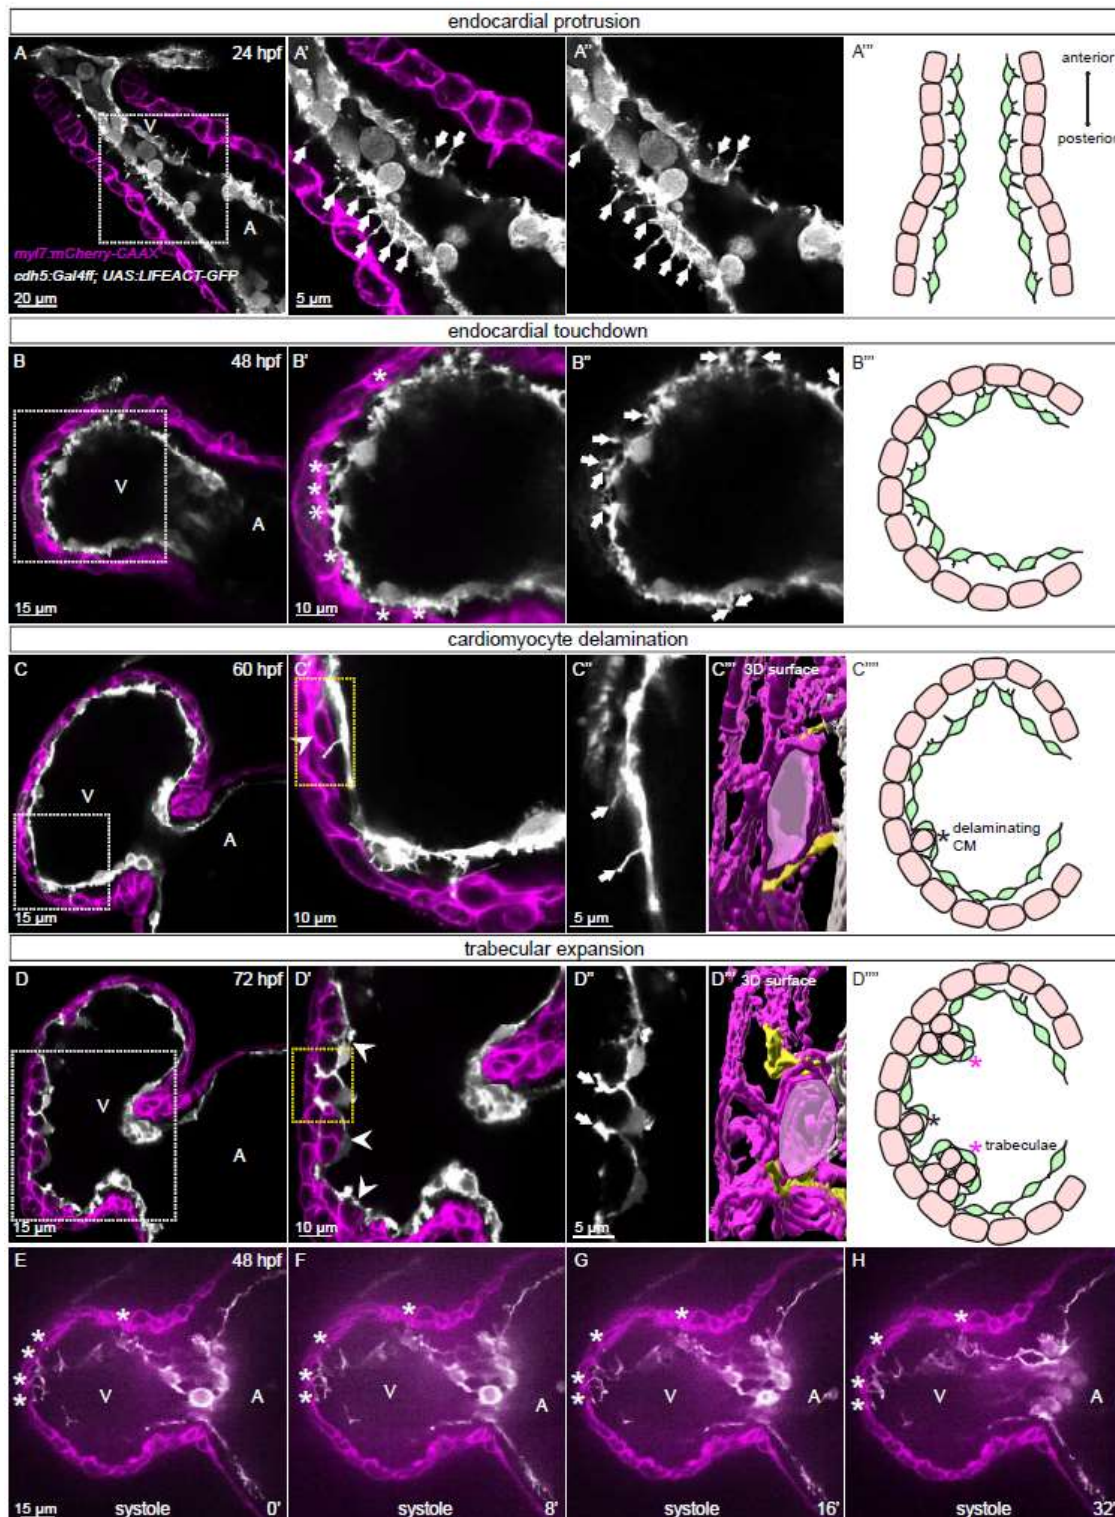

99 **Figure 1. Endocardial-myocardial interactions during zebrafish heart development.** (A-D) Confocal projection  
100 images of the heart of *Tg(myI7:mCherry-CAAX); Tg(cdh5:Gal4ff); Tg(UAS:LIFEACT-GFP)* zebrafish at 24 (A), 48  
101 (B), 60 (C) and 72 (D) hpf. (A-A'') Endocardial protrusions (arrows) towards the myocardium at 24 hpf. (B-B'')  
102 Endocardial protrusions (arrows) and touchdowns (asterisks) with the myocardium at 48 hpf. (C-C'')  
103 Endocardial protrusions (arrows) during CM delamination (arrowheads) at 60 hpf. (C''') 3D surface rendering  
104 of the area in the yellow box in C'. (D-D'') Endocardial protrusions (arrows) during trabecular assembly and  
105 expansion (arrowheads) at 72 hpf. (D''') 3D surface rendering of the area in the yellow box in D'. (A''''-D''')

106 Schematics of endocardial protrusion, endocardial touchdown, CM delamination, and trabecular expansion.  
107 Black asterisks indicate delaminating CMs; purple asterisks indicate trabeculae. **(E-H)** Still images from a  
108 spinning disc time-lapse movie of a 48 hpf *Tg(myI7:mCherry-CAAX); Tg(cdh5:Gal4ff); Tg(UAS:LIFEACT-GFP)*  
109 heart. White asterisks indicate endocardial touchdowns. All images are ventral views, anterior to the top. V,  
110 ventricle; A, atrium.

### 111 **Genetically blocking endocardial protrusion formation reduces myocardial trabeculation**

112 Since we observed a correlation between endocardial protrusions and myocardial trabeculation, we  
113 next aimed to examine the function of endocardial protrusions during cardiac morphogenesis. To  
114 this aim, we generated a transgenic line, *Tg(UAS: irsp53<sup>dn</sup>-p2a-RFP)*, to specifically block protrusion  
115 formation in the endothelium. IRSp53 regulates the actin cytoskeleton to enable cells to form  
116 different types of membrane extensions (Nakagawa et al., 2003; Millard et al., 2005; Scita et al.,  
117 2008). By crossing the *Tg(UAS: irsp53<sup>dn</sup>-p2a-RFP)* line to the *TgBAC(cdh5:Gal4ff)* line to overexpress  
118 *Irsp53<sup>dn</sup>* specifically in endothelial cells, we observed a 70% reduction in the number of endocardial  
119 protrusions at 48 hpf (Figure 2A, B, and E) while their distribution appeared mostly unaffected  
120 (Figure 2A, B, and F). To test the hypothesis that endocardial protrusions modulate myocardial  
121 trabeculation, we analyzed embryos overexpressing *irsp53<sup>dn</sup>* in their endothelial cells in the  
122 *Tg(myI7:BFP-CAAX)*, a CM membrane line. Upon *irsp53<sup>dn</sup>* overexpression in ECs, we detected fewer  
123 endocardial touchdowns (Figure 2A and B). In addition, cardiac trabeculation was reduced (Figure  
124 2C, D, G, and G'). In order to analyze a possible effect of endocardial protrusions on CM  
125 proliferation, we overexpressed *irsp53<sup>dn</sup>* in the endothelium in the context of the *Tg(myI7:mVenus-*  
126 *gmnn)* reporter to visualize cycling CMs. Compared with controls, endothelial overexpression of  
127 *irsp53<sup>dn</sup>* led to significantly fewer mVenus-Gmnn<sup>+</sup> CMs in the ventricle (Figure 2H and I).

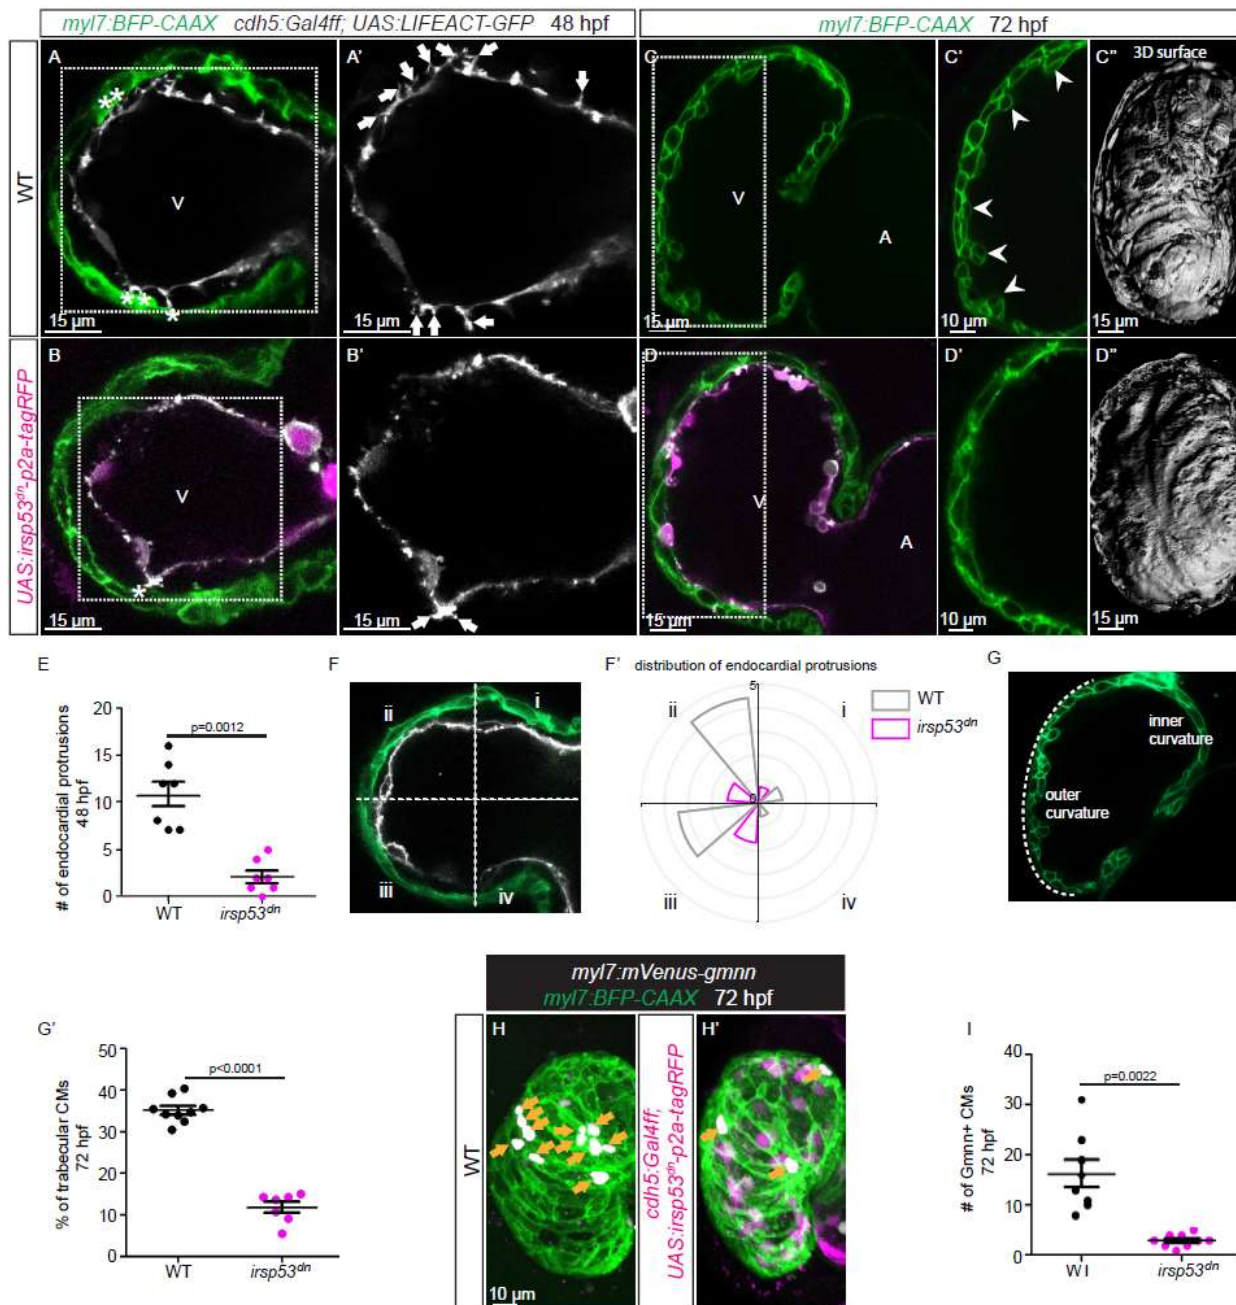

128 **Figure 2. Blocking endocardial protrusion formation reduces cardiac trabeculation.** **(A-D)** Confocal projection  
 129 images of the heart of *Tg(myI7:BFP-CAAX); Tg(cdH5:Gal4ff); Tg(UAS:LIFEACT-GFP); +/- Tg(UAS:irsp53<sup>dn</sup>-p2a-*  
 130 *tagRFP)* zebrafish at 48 **(A-B)** and 72 **(C-D)** hpf. **(A-B)** Endocardial protrusions (white arrows) and touchdowns  
 131 (white asterisks) are reduced in embryos with endothelial overexpression of *irsp53<sup>dn</sup>*. **(C-D)** Cardiac  
 132 trabeculation (arrowheads) is reduced in larvae with endothelial overexpression of *irsp53<sup>dn</sup>*; **(C''-D'')** 3D  
 133 rendering. **(E)** Quantification of the number of endocardial protrusions in wild-type and in embryos with  
 134 endothelial overexpression of *irsp53<sup>dn</sup>* at 48 hpf. **(F-F')** Illustration of the division of the 48 hpf ventricle into 4  
 135 regions **(F)**. Distribution and average number of endocardial protrusions in different regions of mid-sagittal  
 136 sections of the ventricle from 48 hpf wild-type and *irsp53<sup>dn</sup>* embryos **(F')**. **(G-G')** Illustration of the division of  
 137 the 72 hpf ventricle into the outer and inner curvature **(G)**. Quantification of the number of trabecular CMs in  
 138 the outer curvature of wild-type and *irsp53<sup>dn</sup>* larvae at 72 hpf **(G')**. **(H-H')** 72 hpf larvae with endothelial

139 overexpression of *irsp53<sup>dn</sup>* display a reduced number of *myl7:mVenus-Gmnn<sup>+</sup>* CMs (yellow arrows) in their  
140 ventricle. **(I)** Quantification of the number of mVenus-Gmnn<sup>+</sup> CMs in the ventricle of wild-type and *irsp53<sup>dn</sup>*  
141 larvae at 72 hpf. All images are ventral views, anterior to the top. V, ventricle; A, atrium. Data in graphs  
142 expressed as mean ± SEM.

143 **Apelin signaling positively regulates endocardial protrusion formation and myocardial**  
144 **trabeculation**

145 We have recently shown that Apelin signaling regulates endothelial protrusion formation during  
146 angiogenesis in the zebrafish trunk (Helker et al., 2020). Therefore, we hypothesized that Apelin  
147 signaling might also regulate endocardial protrusion formation. To examine the expression pattern  
148 of the apelin ligand and receptor genes during heart development in zebrafish embryos, we first  
149 performed whole mount *in situ* hybridization. We detected *apln*, but no *apela*, expression within the  
150 heart (Figure 3-figure supplement 1A-D). For the receptor genes, we could only detect *aplnrb*  
151 expression in the heart (Figure 3-figure supplement 1E-H). In order to visualize the expressions of  
152 *apln* and *aplnrb* at single cell resolution in the heart, we examined the *TgBAC(apln:EGFP)* reporter  
153 line (Helker et al., 2020) line and generated a novel *Tg(aplnrb:VenusPEST)* reporter line. We detected  
154 *apln:EGFP* expression in the myocardium at 48 and 72 hpf (Figure 3A and B). Furthermore, we  
155 detected *aplnrb:VenusPEST* expression in the endocardium at 48 and 72 hpf (Figure 3C and D). These  
156 results suggest that *apln* is expressed in the myocardium while *aplnrb* is expressed in EdCs. Based on  
157 these results, we hypothesized that Apelin signaling plays a role during endocardium-myocardium  
158 interactions.

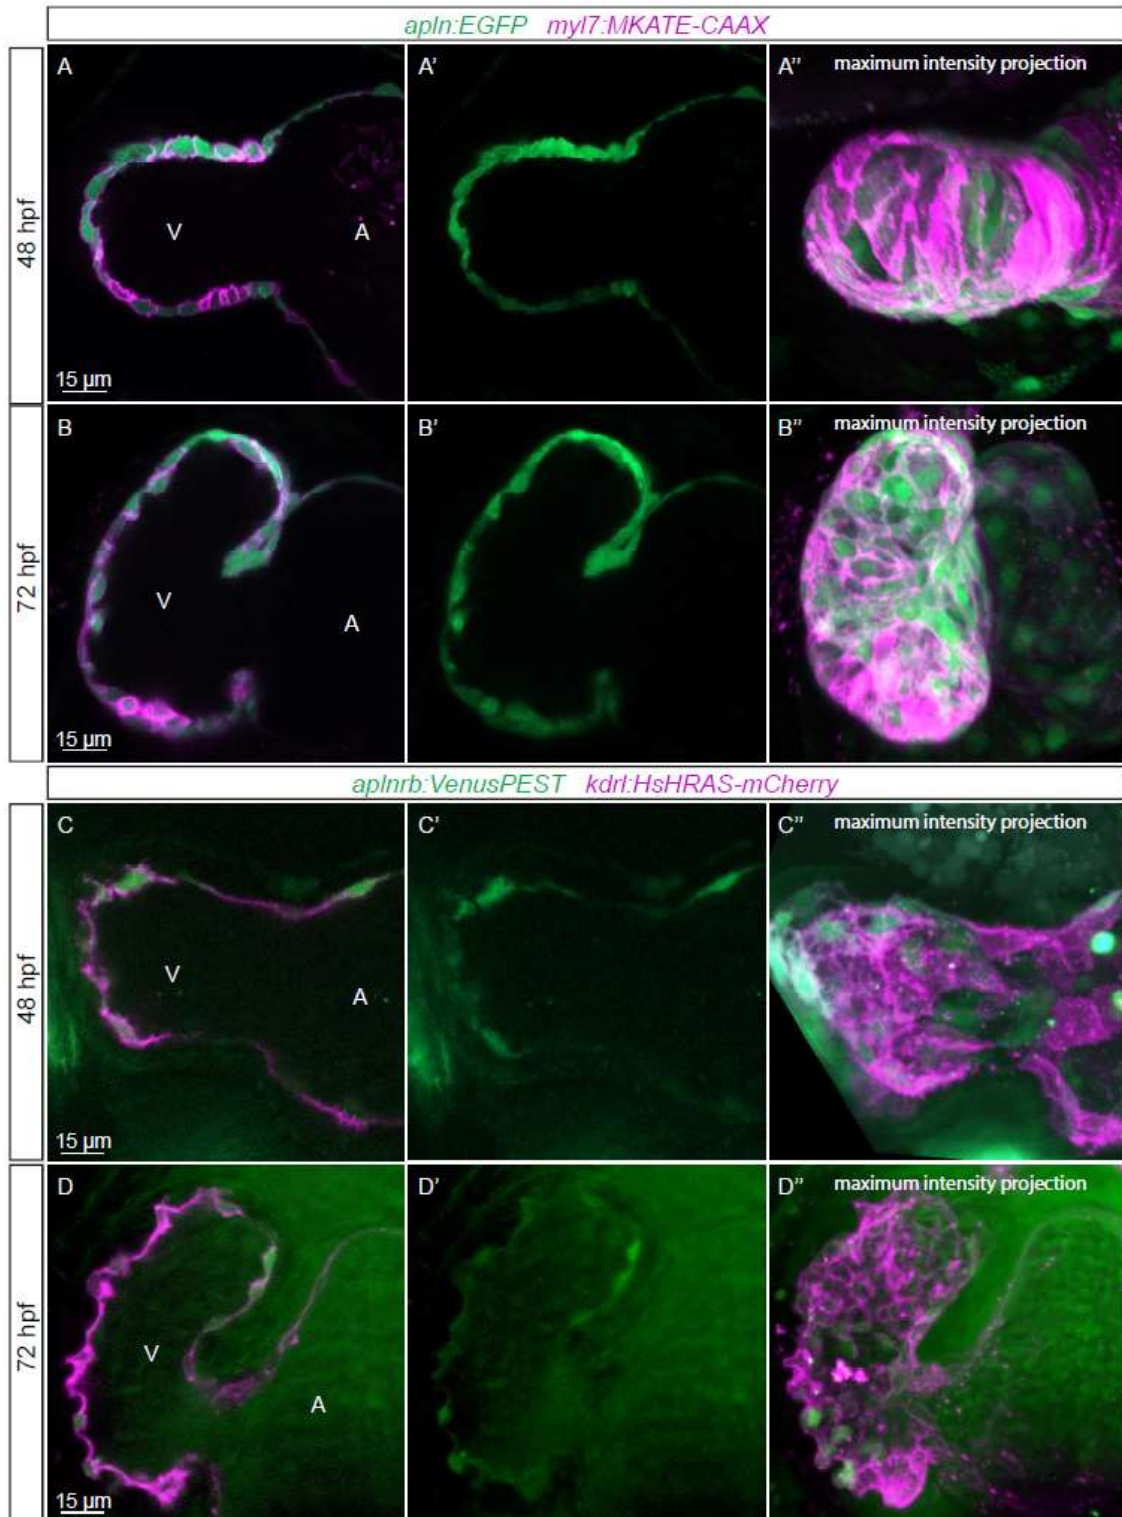

159 **Figure 3. Expression pattern of Apelin signaling pathway components. (A-D)** Confocal projection images of  
160 the heart of *TgBAC(apln:EGFP); Tg(myI7:MKATE-CAAX)* (A, B) and *TgBAC(aplnrb:VenusPEST); Tg(kdrl:HsHRAS-*  
161 *mCherry)* (C, D) zebrafish at 48 (A, C) and 72 (B, D) hpf. (A''-D'') Maximum intensity projections. (A-B)  
162 *TgBAC(apln:EGFP)* expression is detectable in the myocardium at 48 (A) and 72 (B) hpf. (C-D)  
163 *TgBAC(aplnrb:VenusPEST)* expression is detectable in the endocardium with higher expression in the  
164 ventricular endocardium at 48 (C) and 72 (D) hpf. All images are ventral views, anterior to the top. V, ventricle;  
165 A, atrium.



166 To test this hypothesis, we used mutants for *aplnra* (Helker et al., 2015), *aplnrb* (Helker et al., 2015),  
167 *apln* (Helker et al., 2015), and *apela* (Chng et al., 2013). Since *apela* mutants fail to form a heart  
168 (Chng et al., 2013), we did not analyze them. Most *aplnrb* mutants also fail to form a heart (Scott et  
169 al., 2007; Zeng et al., 2007), but some do (Figure 4-figure supplement 1C). By analyzing *aplnrb*  
170 mutants those do form a heart, we observed that they exhibit a reduced number of endocardial  
171 protrusions at 48 hpf (Figure 4-figure supplement 2A and B) and trabeculae at 72 hpf (Figure 4-figure  
172 supplement 2C and D). In wild-type embryos, the CJ between the endocardium and myocardium in  
173 the outer curvature of the ventricle appears to be mostly degraded at 72 hpf (Figure 4-figure  
174 supplement 2C); however, the CJ in *aplnrb* mutants appears to be thicker at this stage (Figure 4-  
175 figure supplement 2D). In addition, *aplnra* mutants exhibit a reduced number of trabeculae at 72 hpf  
176 (Figure 4-figure supplement 2E and F).

177 While *apln* mutants form a heart (Figure 4-figure supplement 1F), they display a significantly lower  
178 number of endocardial protrusions at 24 and 48 hpf (Figure 4A-D, G-I). In line with fewer endocardial  
179 protrusions, *apln* mutants exhibit a reduced number of endocardial touchdowns at 48 hpf (Figure 4C  
180 and D). Altogether, these results indicate that Apelin signaling regulates endocardial protrusion  
181 formation.

182 To examine the function of Apelin dependent endocardial protrusions on cardiac trabeculation, we  
183 first analyzed trabecular formation in *apln* mutants. Homozygous *apln* mutants exhibit a reduced  
184 number of trabeculae at 72 hpf (Figure 4E, F, and J). In order to analyze CM proliferation, we  
185 performed EdU labeling and quantified EdU<sup>+</sup> CMs in *apln* mutant and wild-type sibling larvae.  
186 Homozygous *apln* mutants exhibit a significantly decreased number of EdU<sup>+</sup> CMs in their ventricle  
187 (Figure 4-figure supplement 3). In addition, *apln* mutants display a significantly thicker CJ compared  
188 with wild-type siblings at 72 hpf (Figure 4C-F, K, and L). However, we did not observe any obvious  
189 defects in sarcomere formation (Figure 4-figure supplement 4) in *apln* mutants at 72 hpf.

190 Notch signaling negatively regulates endothelial sprouting and protrusion formation in several  
191 vascular beds (Hellstrom et al., 2007; Leslie et al., 2007; Siekmann and Lawson, 2007; Suchting et al.,  
192 2007). In order to analyze whether Notch signaling also regulates endocardial protrusion formation,  
193 we blocked Notch signaling by treating embryos with the  $\gamma$ -secretase inhibitor RO4929097, and  
194 observed a decrease of Notch reporter expression (Figure 4-figure supplement 5A and B) as well as  
195 an increased number of endocardial protrusions in the ventricle (Figure 4-figure supplement 5C-E).  
196 Together, these results show that myocardial derived Apelin positively regulates endocardial  
197 protrusion formation while Notch signaling negatively regulates it. Furthermore, Apelin signaling is  
198 also required for cardiac trabeculation, possibly via the formation of endocardial protrusions.

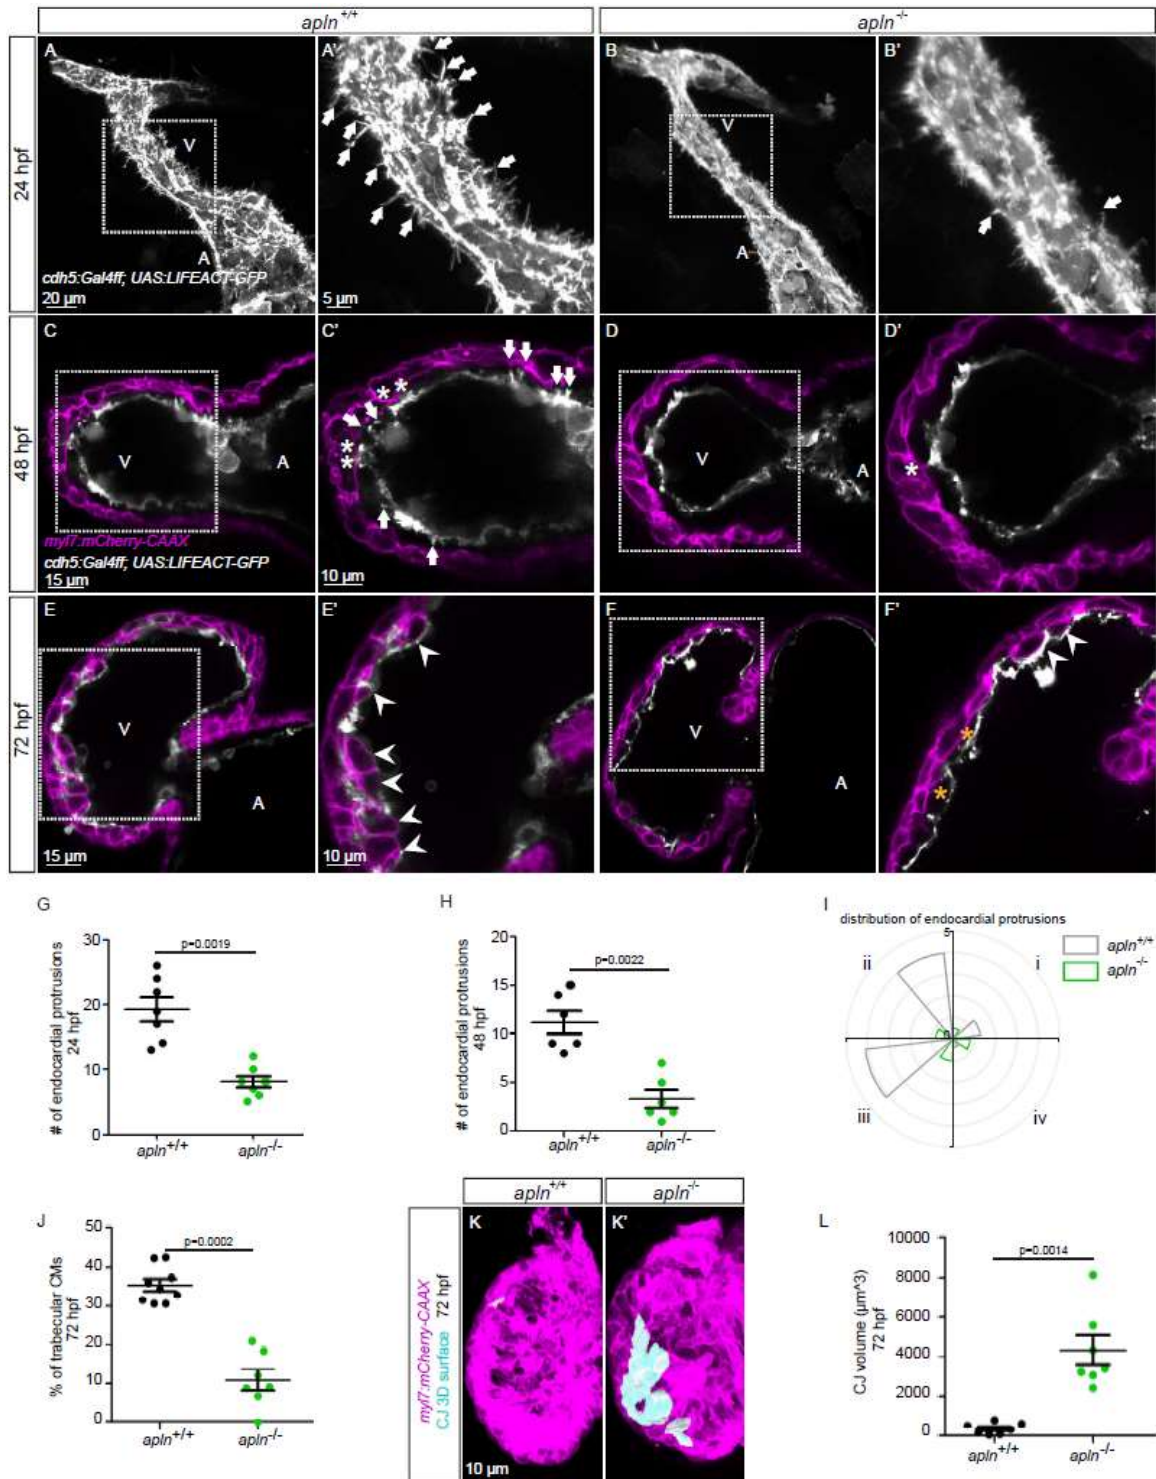

199 **Figure 4. Loss of Apelin signaling leads to reduced endocardial protrusions and reduced myocardial**  
 200 **trabeculation.** (**A-F**) Confocal projection images of the heart of *Tg(cdh5:Gal4ff); Tg(UAS:LIFEACT-GFP)* zebrafish  
 201 at 24 hpf (**A-B**) and of the heart of *Tg(myf7:mCherry-CAAX); Tg(cdh5:Gal4ff); Tg(UAS:LIFEACT-GFP)*  
 202 zebrafish at 48 (**C-D**) and 72 (**E-F**) hpf. Maximum intensity projections (**A-B**) and mid-sagittal sections (**C-F**). (**A**)  
 203 Endocardial protrusions (arrows) in *apln*<sup>+/+</sup> embryos at 24 hpf. (**B**) Endocardial protrusions (arrows) are  
 204 reduced in *apln*<sup>-/-</sup> siblings at 24 hpf. (**C-D**) Endocardial protrusions (arrows) and touchdowns (white asterisks)  
 205 are reduced in *apln*<sup>-/-</sup> embryos (**D**) at 48 hpf compared with *apln*<sup>+/+</sup> siblings (**C**). (**E-F**) *apln*<sup>-/-</sup> larvae (**F**) exhibit  
 206 reduced trabeculation (arrowheads) and thicker CJ (yellow asterisks) at 72 hpf compared with *apln*<sup>+/+</sup> siblings

207 **(E. (G-H)** Quantification of the number of endocardial protrusions in the ventricle of *apln*<sup>+/+</sup> and *apln*<sup>-/-</sup> siblings  
208 at 24 **(G)** and 48 **(H)** hpf. **(I)** Distribution and average number of endocardial protrusions in different regions of  
209 mid-sagittal sections of the ventricle from 48 hpf *apln*<sup>+/+</sup> and *apln*<sup>-/-</sup> siblings. **(J)** Quantification of the number of  
210 trabecular CMs in the outer curvature of *apln*<sup>+/+</sup> and *apln*<sup>-/-</sup> siblings at 72 hpf. **(K-K')** Maximum intensity  
211 projections. *apln*<sup>-/-</sup> larvae **(K')** exhibit a thicker CJ at 72 hpf compared with *apln*<sup>+/+</sup> siblings **(K)**. **(L)**  
212 Quantification of the CJ volume in the outer curvature of *apln*<sup>+/+</sup> and *apln*<sup>-/-</sup> siblings at 72 hpf. All images are  
213 ventral views, anterior to the top. V, ventricle; A, atrium; +/+, *apln*<sup>+/+</sup>; -/-, *apln*<sup>-/-</sup>. Data in graphs expressed as  
214 mean ± SEM.

### 215 **The effect of endocardial *nrg2a* in trabeculation is mediated by endocardial protrusions**

216 Nrg-ErbB signaling is indispensable for cardiac trabeculation in mouse and zebrafish (Gassmann et al.,  
217 1995; Lee et al., 1995; Meyer and Birchmeier, 1995; Lai et al., 2010; Liu et al., 2010; Rasouli and  
218 Stainier, 2017). To determine whether endocardial protrusions modulate Nrg-ErbB signaling, we  
219 overexpressed *nrg2a* in the endocardium using a *Tg(fli1a:nrg2a-p2a-tdTomato)* line (Rasouli and  
220 Stainier, 2017). Overexpression of *nrg2a* in the endocardium results in hypertrabeculation as well as  
221 a multilayered myocardium (Figure 5A, B, and E-G). Strikingly, overexpressing *nrg2a* in the  
222 endothelium while blocking endocardial protrusion formation by endothelial overexpression of  
223 *irsp53<sup>dn</sup>* is not sufficient to restore cardiac trabeculation and induce CM multilayering (Figure 5C-C''  
224 and E-G). In line with these results, overexpressing *nrg2a* in the endothelium of homozygous *apln*  
225 mutants is not sufficient to restore cardiac trabeculation and induce CM multilayering (Figure 5D-D''  
226 and E-G). Importantly, we did not detect a change in the expression levels of *nrg2a* in *apln* mutant  
227 hearts at 48 hpf (Figure 5-figure supplement 1). Taken together, these data suggest that endocardial  
228 protrusions are required for Nrg-ErbB signaling.

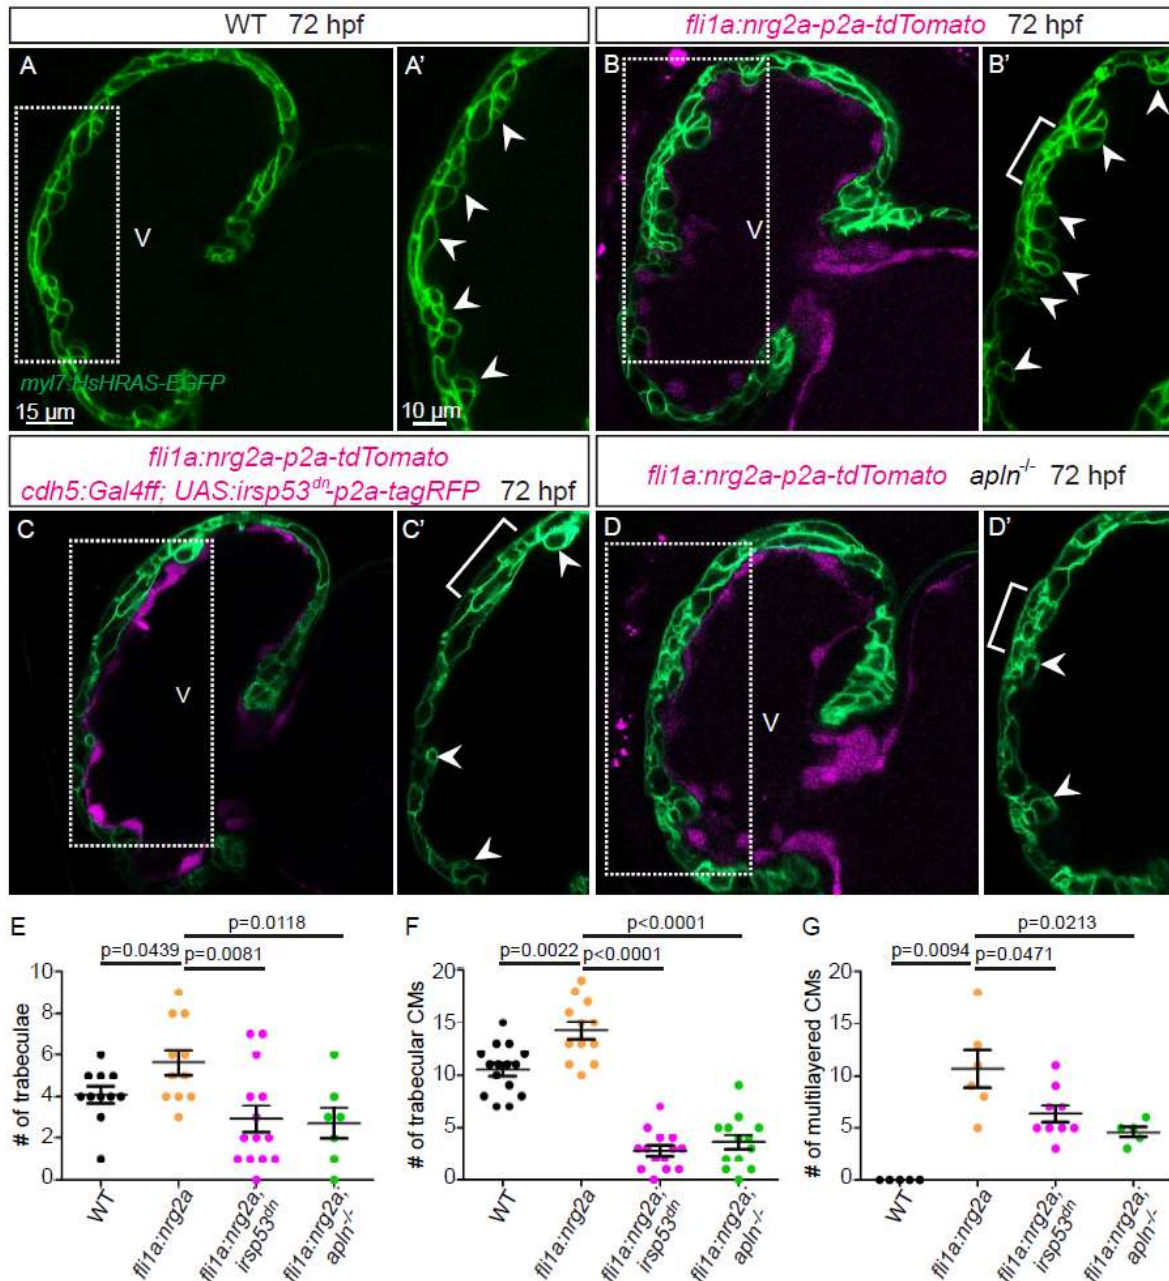

229 **Figure 5. Endocardial protrusions are necessary for *nrg2a* overexpression phenotypes. (A-D)** Confocal  
 230 projection images of the heart of *Tg(myI7:HsHRAS-EGFP)* larvae at 72 hpf. **(A-B)** Overexpression of *nrg2a* in the  
 231 endothelium **(B)** leads to an increased number of trabeculae (arrowheads) and the multilayering of CMs  
 232 (brackets) compared with wild-type **(A)**. **(C)** Larvae with endothelial overexpression of *nrg2a* and *irsp53<sup>dn</sup>*  
 233 exhibit a reduced number of trabeculae (arrowheads) and of multilayered CMs (brackets) compared with  
 234 larvae with endothelial overexpression of *nrg2a* alone **(B)**. **(D)** *apln* mutant larvae with endothelial  
 235 overexpression of *nrg2a* exhibit a reduced number of trabeculae (arrowheads) and of multilayered CMs  
 236 (brackets) compared with larvae with endothelial overexpression of *nrg2a* alone **(B)**. **(E)** Quantification of the  
 237 number of trabeculae. **(F)** Quantification of the number of trabecular CMs. **(G)** Quantification of the number  
 238 of multilayered CMs in the ventricle. Brackets indicate multilayered CMs. All images are ventral views, anterior  
 239 to the top. V, ventricle. Data in graphs expressed as mean  $\pm$  SEM.

240 **Genetically blocking endocardial protrusion formation attenuates Erk signaling in cardiomyocytes**

241 An important molecule in the Nrg/ErbB signaling pathway is the extracellular signal-regulated kinase  
242 Erk (Lai et al., 2010). In order to visualize Erk activity in CMs in living zebrafish, as a readout of ErbB  
243 signaling, we generated novel reporter lines (*Tg(myI7:ERK-KTR-Clover-p2a-H2B-tagBFP)* and  
244 *Tg(myI7:ERK-KTR-Clover-p2a-H2B-mScarlet)*) by using the kinase translocation reporter (KTR)  
245 technology (Regot et al., 2014; de la Cova et al., 2017). When Erk is inactive, the KTR is  
246 unphosphorylated and Clover can be detected in the nucleus; in contrast, when Erk is active, the KTR  
247 is phosphorylated and Clover can be detected in the cytoplasm (de la Cova et al., 2017). We  
248 observed that most ventricular CMs in wild-type larvae display active Erk signaling with cytoplasmic  
249 Clover expression (Figure 6A). Treating the reporter with a MEK inhibitor led to an increased number  
250 of ventricular CMs with nuclear Clover expression (i.e., inactive Erk signaling) indicating that our  
251 reporter is functional (Figure 6-figure supplement 1). Next, we treated this reporter with an ErbB2  
252 inhibitor and found an increased number of ventricular CMs with nuclear Clover expression (Figure  
253 6B). To determine whether endocardial protrusions modulate myocardial Erk signaling activity, we  
254 genetically blocked endocardial protrusions via endothelial overexpression of *irsp53<sup>dn</sup>* (Figure 6C).  
255 We observed more ventricular CMs with nuclear Clover expression in the larvae overexpressing  
256 *irsp53<sup>dn</sup>* (Figure 6C and E) compared with control (Figure 6A and E), indicating more ventricular CMs  
257 with inactive Erk signaling. In line with these results, we observed more CMs with inactive Erk  
258 signaling in homozygous *apln* mutants (Figure 6D and E) compared with wild-type siblings (Figure 6A  
259 and E). Altogether, these observations indicate that Apelin signaling dependent endocardial  
260 protrusions modulate Nrg/ErbB/Erk signaling in CMs.

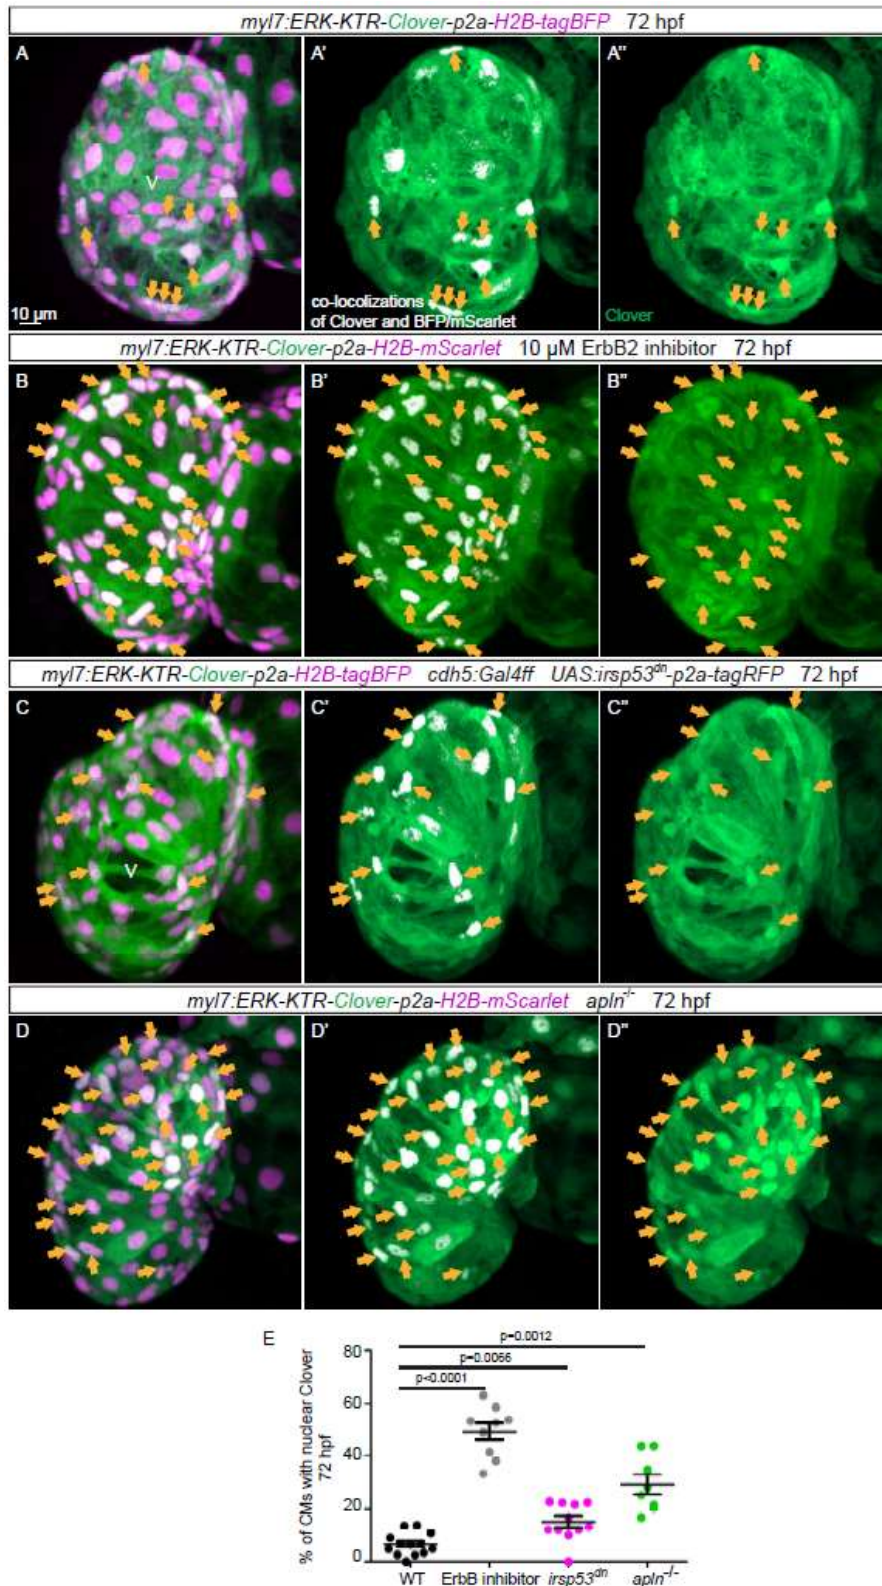

261 **Figure 6. Blocking endocardial protrusion formation reduces myocardial Erk signaling activity. (A-D)**  
 262 Maximum intensity projections of confocal images of the heart of *Tg(myI7:ERK-KTR-Clover-p2a-H2B-*  
 263 *tagBFP/mScarlet)* larvae at 72 hpf. **(A)** Visualization of Erk activity by a CM specific ERK-KTR reporter. Nuclear  
 264 Clover expression (arrows) indicates CMs with inactive Erk signaling. **(B)** Larvae treated with an ErbB2 inhibitor  
 265 exhibit an increased number of CMs with inactive Erk signaling (arrows) compared with control larvae **(A)**. **(C)**  
 266 Larvae with endothelial overexpression of *irsp53<sup>dn</sup>* exhibit an increased number of CMs with inactive Erk

267 signaling (arrows) compared with wild-type larvae **(A)**. **(D)** *apln* mutant larvae exhibit an increased number of  
268 CMs with inactive Erk signaling (arrows) compared with *apln*<sup>+/+</sup> siblings. **(E)** Quantification of ventricular CMs  
269 with nuclear Clover expression. All images are ventral views, anterior to the top. V, ventricle. Data in graphs  
270 expressed as mean ± SEM.

## 271 **Discussion**

### 272 **Endocardial protrusions contribute to trabeculation**

273 Cardiac trabeculation is initiated, at least in zebrafish, by individual CMs delaminating from the  
274 compact myocardial wall and protruding into the lumen (Liu et al., 2010; Staudt et al., 2014; Jimenez-  
275 Amilburu et al., 2016; Priya et al., 2020). Several studies have reported that the endocardium plays  
276 an important role during cardiac trabeculation (Grego-Bessa et al., 2007; Lai et al., 2010; D'Amato et  
277 al., 2016; Rasouli and Stainier, 2017; Del Monte-Nieto et al., 2018; Qu et al., 2019). Furthermore, it  
278 has recently been shown that EdCs, similar to ECs, undergo sprouting (Del Monte-Nieto et al., 2018).  
279 However, in comparison with endocardial sprouting, little is known about the morphogenetic events  
280 underlying endocardial sprouting and their effect on cardiac trabeculation.

281 In mouse, endocardial sprouting and touchdown formation occur early during cardiac trabeculation  
282 (Del Monte-Nieto et al., 2018). These observations are in line with our data in zebrafish suggesting  
283 that the morphogenetic events of cardiac trabeculation are evolutionarily conserved. CM  
284 delamination and trabeculation occur in the outer curvature of the ventricle (Liu et al., 2010;  
285 Jimenez-Amilburu et al., 2016; Rasouli and Stainier, 2017). This observation is in line with our finding  
286 that endocardial protrusions are mostly located in the outer curvature of the ventricle. The spatial  
287 and temporal correlation between the emergence of endocardial protrusions and CM delamination  
288 therefore suggests a role for endocardial protrusions in cardiac trabeculation.

### 289 **Molecular regulators of endocardial sprouting**

290 During sprouting angiogenesis, so-called tip cells lead the new sprouts (Gerhardt, 2008). Tip cells  
291 dynamically extend filopodia to identify growth factors in their environment (Gerhardt, 2008). Apelin  
292 and Notch signaling have been previously identified as regulators of endothelial filopodia formation  
293 (Hellstrom et al., 2007; Suchting et al., 2007; Helker et al., 2020). In contrast, the pathways  
294 regulating endocardial sprouting are largely unknown. Only Tie2 signaling has been identified to date  
295 as a regulator of endocardial sprouting, and Tie2 deficient mice exhibit fewer endocardial  
296 touchdowns (Qu et al., 2019). We have recently shown that Apelin signaling regulates filopodia  
297 formation during sprouting angiogenesis in the trunk (Helker et al., 2020). In line with these  
298 published observations, we now show that Apelin regulates endocardial filopodia formation and

299 endocardial sprouting (Figure 6-figure supplement 2), highlighting a conserved role for Apelin  
300 signaling during endothelial and endocardial sprouting.

301 Consistent with the regulation of sprouting angiogenesis by Notch signaling in ECs (Hellstrom et al.,  
302 2007; Leslie et al., 2007; Siekmann and Lawson, 2007; Suchting et al., 2007), we found that Notch  
303 signaling also negatively regulates endocardial protrusion formation. Interestingly, inhibition of  
304 Notch signaling also leads to an increased number of delaminated CMs and trabeculae (Han et al.,  
305 2016; Priya et al., 2020).

### 306 **Endocardium-myocardium communication is essential for trabeculation**

307 Paracrine communication is usually thought to be based on the diffusion of soluble morphogens. The  
308 Nrg/ErbB signaling pathway, which is required for cardiac trabeculation, resembles such a classical  
309 paracrine signaling pathway (Gassmann et al., 1995; Lee et al., 1995; Meyer and Birchmeier, 1995; Lai  
310 et al., 2010; Liu et al., 2010; Rasouli and Stainier, 2017). Several studies have shown that endocardial  
311 derived Nrg is required to activate ErbB receptor complexes on CMs (Gassmann et al., 1995; Meyer  
312 and Birchmeier, 1995; Grego-Bessa et al., 2007; Rasouli and Stainier, 2017).

313 Like other receptor tyrosine kinases, ErbB receptors activate multiple signaling cascades, including  
314 the MAPK cascade, upon ligand stimulation, leading to the phosphorylation of ERK1/2 (Sweeney et  
315 al., 2001; Wee and Wang, 2017). Accordingly, attenuated phosphorylation of ERK in CMs is observed  
316 in mice deficient in Nrg1/ErbB signaling (Lai et al., 2010). By analyzing a novel reporter of Erk activity  
317 in CMs, we observed that the inhibition of endocardial protrusions as well as the genetic inactivation  
318 of Apelin signaling lead to attenuated Erk phosphorylation in CMs. Together, these data suggest that  
319 Apelin signaling dependent endocardial protrusions modulate ErbB signaling in CMs (Figure 6-figure  
320 supplement 2).

321 It has recently been shown that filopodia from ECs modulate neurogenesis by affecting progenitor  
322 cell proliferation in the developing brain of mice and zebrafish (Di Marco et al., 2020; Taberner et al.,  
323 2020). Of interest, ErbB signaling is also known for its function within the nervous system (Buonanno  
324 and Fischbach, 2001). Thus, one might speculate that Nrg/ErbB signaling also plays a role during the  
325 modulation of neurogenesis by endothelial filopodia. Several studies reported cell to cell  
326 communication by cytonemes in different animal models (Ramirez-Weber and Kornberg, 1999;  
327 Holzer et al., 2012; Luz et al., 2014; Sagar et al., 2015). Whether endocardial protrusions qualify as  
328 cytonemes needs further analysis. However, our data indicate that Apelin dependent endocardial  
329 protrusions are required for the communication between endocardial and myocardial cells via  
330 Nrg/ErbB signaling (Figure 6-figure supplement 2).



331 In summary, our work describes how endocardial sprouting is integrated into Nrg/ErbB signaling and  
332 cardiac trabeculation. Furthermore, we identify Apelin signaling as a regulator of endocardial  
333 sprouting.

### 334 **Acknowledgements**

335 We thank Gisela Thana Hartmann, Sarah Howard, Dr. Radhan Ramadass, and all fish facility staff for  
336 their technical support; Dr. Thomas Juan, Dr. Samuel Capon, Dr. Jordan Welker, Giulia Boezio and Yiu  
337 Chun Law for critical comments on the manuscript; Dr. Stefan Baumeister for the schematic model;  
338 and Dr. Gonzalo del Monte-Nieto for discussion. Research in the Stainier laboratory is supported in  
339 part by the Max Planck Society, the DFG (SFB 834/4) and the Leducq Foundation. Research in the  
340 Helker laboratory is supported in part by the DFG (SFB 834/4).

### 341 **Author contributions**

342 J.Q., D.Y.R.S. and C.S.M.H. designed experiments, J.Q. and A.R. performed experiments, A.R., R.P.,  
343 S.M. provided unpublished transgenic lines, J.Q., D.Y.R.S., C.S.M.H. analyzed data, J.Q., D.Y.R.S., and  
344 C.S.M.H. wrote the manuscript. All authors commented on the manuscript.

### 345 **Author information**

346 The authors declare no competing interests.

### 347 **Supplemental videos**

348 **Figure 1-video 1. Endocardial touchdowns during cardiac contraction. Related to figure 1E-1H.**

349 Beating 48 hpf zebrafish heart. Magenta, myocardium; white, endocardium.

350 **Figure 1-video 2. Endocardial protrusions extend along delaminating CMs at 60 hpf. Related to**  
351 **figure 1C'''.**

352 3D surface rendering of a 60 hpf ventricle. Magenta, myocardium; white, endocardium; yellow,  
353 endocardial protrusions extending along delaminating CMs.

354 **Figure 1-video 3. Endocardial protrusions are in close proximity to trabecular CMs at 72 hpf.**  
355 **Related to figure 1D'''.**

356 3D surface rendering of a 72 hpf ventricle. Magenta, myocardium; white, endocardium; yellow,  
357 endocardial protrusions in close proximity to trabecular CMs.

### 358 **References**

- 359 STAINIER, D. Y. & FISHMAN, M. C. 1992. Patterning the zebrafish heart tube: acquisition of  
360 anteroposterior polarity. *Dev Biol*, 153, 91-101.
- 361 GASSMANN, M., CASAGRANDA, F., ORIOLI, D., SIMON, H., LAI, C., KLEIN, R. & LEMKE, G. 1995.  
362 Aberrant neural and cardiac development in mice lacking the ErbB4 neuregulin receptor.  
363 *Nature*, 378, 390-4.
- 364 LEE, K. F., SIMON, H., CHEN, H., BATES, B., HUNG, M. C. & HAUSER, C. 1995. Requirement for  
365 neuregulin receptor erbB2 in neural and cardiac development. *Nature*, 378, 394-8.
- 366 MEYER, D. & BIRCHMEIER, C. 1995. Multiple essential functions of neuregulin in development.  
367 *Nature*, 378, 386-90.
- 368 SURI, C., JONES, P. F., PATAN, S., BARTUNKOVA, S., MAISONPIERRE, P. C., DAVIS, S., SATO, T. N. &  
369 YANCOPOULOS, G. D. 1996. Requisite role of angiopoietin-1, a ligand for the TIE2 receptor,  
370 during embryonic angiogenesis. *Cell*, 87, 1171-80.
- 371 SEDMERA, D. & THOMAS, P. S. 1996. Trabeculation in the embryonic heart. *Bioessays*, 18, 607.
- 372 BRUTSAERT, D. L., DE KEULENAER, G. W., FRANSEN, P., MOHAN, P., KALUZA, G. L., ANDRIES, L. J.,  
373 ROULEAU, J. L. & SYS, S. U. 1996. The cardiac endothelium: functional morphology,  
374 development, and physiology. *Prog Cardiovasc Dis*, 39, 239-62.
- 375 RAMIREZ-WEBER, F. A. & KORNBERG, T. B. 1999. Cytonemes: Cellular processes that project to the  
376 principal signaling center in *Drosophila* imaginal discs. *Cell*, 97, 599-607.
- 377 SEDMERA, D., PEXIEDER, T., VUILLEMIN, M., THOMPSON, R. P. & ANDERSON, R. H. 2000.  
378 Developmental patterning of the myocardium. *Anat Rec*, 258, 319-37.
- 379 OECHSLIN, E. N., ATTENHOFER JOST, C. H., ROJAS, J. R., KAUFMANN, P. A. & JENNI, R. 2000. Long-  
380 term follow-up of 34 adults with isolated left ventricular noncompaction: a distinct  
381 cardiomyopathy with poor prognosis. *J Am Coll Cardiol*, 36, 493-500.
- 382 BUONANNO, A. & FISCHBACH, G. D. 2001. Neuregulin and ErbB receptor signaling pathways in the  
383 nervous system. *Curr Opin Neurobiol*, 11, 287-96.
- 384 SWEENEY, C., FAMBROUGH, D., HUARD, C., DIAMONTI, A. J., LANDER, E. S., CANTLEY, L. C. &  
385 CARRAWAY, K. L., 3RD 2001. Growth factor-specific signaling pathway stimulation and gene  
386 expression mediated by ErbB receptors. *J Biol Chem*, 276, 22685-98.
- 387 NAKAGAWA, H., MIKI, H., NOZUMI, M., TAKENAWA, T., MIYAMOTO, S., WEHLAND, J. & SMALL, J. V.  
388 2003. IRSp53 is colocalised with WAVE2 at the tips of protruding lamellipodia and filopodia  
389 independently of Mena. *Journal of Cell Science*, 116, 2577-2583.
- 390 GERHARDT, H., GOLDING, M., FRUTTIGER, M., RUHRBERG, C., LUNDKVIST, A., ABRAMSSON, A.,  
391 JELTSCH, M., MITCHELL, C., ALITALO, K., SHIMA, D. & BETSHOLTZ, C. 2003. VEGF guides  
392 angiogenic sprouting utilizing endothelial tip cell filopodia. *J Cell Biol*, 161, 1163-77.
- 393 CLAUDIA, S. & JOSEF, F. 2004. Left ventricular hypertrabeculation/noncompaction. *Journal of the*  
394 *American Society of Echocardiography*, 17, 91-100.
- 395 TACHIBANA, K., JONES, N., DUMONT, D. J., PURI, M. C. & BERNSTEIN, A. 2005. Selective role of a  
396 distinct tyrosine residue on Tie2 in heart development and early hematopoiesis. *Mol Cell Biol*,  
397 25, 4693-702.
- 398 MILLARD, T. H., BOMPARD, G., HEUNG, M. Y., DAFFORN, T. R., SCOTT, D. J., MACHESKY, L. M. &  
399 FUTTERER, K. 2005. Structural basis of filopodia formation induced by the IRSp53/MIM  
400 homology domain of human IRSp53. *EMBO J*, 24, 240-50.
- 401 SUCHTING, S., FREITAS, C., LE NOBLE, F., BENEDITO, R., BREANT, C., DUARTE, A. & EICHMANN, A.  
402 2007. The Notch ligand Delta-like 4 negatively regulates endothelial tip cell formation and  
403 vessel branching. *Proc Natl Acad Sci U S A*, 104, 3225-30.
- 404 HELLSTROM, M., PHNG, L. K., HOFMANN, J. J., WALLGARD, E., COULTAS, L., LINDBLOM, P., ALVA, J.,  
405 NILSSON, A. K., KARLSSON, L., GAIANO, N., YOON, K., ROSSANT, J., IRUELA-ARISPE, M. L.,  
406 KALEN, M., GERHARDT, H. & BETSHOLTZ, C. 2007. Dll4 signalling through Notch1 regulates  
407 formation of tip cells during angiogenesis. *Nature*, 445, 776-780.
- 408 GREGO-BESSA, J., LUNA-ZURITA, L., DEL MONTE, G., BOLOS, V., MELGAR, P., ARANDILLA, A.,  
409 GARRATT, A. N., ZANG, H., MUKOUYAMA, Y. S., CHEN, H. Y., SHOU, W. N., BALLESTAR, E.,

- 410 ESTELLER, M., ROJAS, A., PEREZ-POMARES, J. M. & DE LA POMPA, J. L. 2007. Notch signaling  
411 is essential for ventricular chamber development. *Developmental Cell*, 12, 415-429.
- 412 LESLIE, J. D., ARIZA-MCNAUGHTON, L., BERMANGE, A. L., MCADOW, R., JOHNSON, S. L. & LEWIS, J.  
413 2007. Endothelial signalling by the Notch ligand Delta-like 4 restricts angiogenesis.  
414 *Development*, 134, 839-44.
- 415 SIEKMANN, A. F. & LAWSON, N. D. 2007. Notch signalling limits angiogenic cell behaviour in  
416 developing zebrafish arteries. *Nature*, 445, 781-4.
- 417 STANKUNAS, K., HANG, C. T., TSUN, Z. Y., CHEN, H., LEE, N. V., WU, J. I., SHANG, C., BAYLE, J. H.,  
418 SHOU, W., IRUELA-ARISPE, M. L. & CHANG, C. P. 2008. Endocardial Brg1 represses ADAMTS1  
419 to maintain the microenvironment for myocardial morphogenesis. *Dev Cell*, 14, 298-311.
- 420 SCITA, G., CONFALONIERI, S., LAPPALAINEN, P. & SUETSUGU, S. 2008. IRSp53: crossing the road of  
421 membrane and actin dynamics in the formation of membrane protrusions. *Trends Cell Biol*,  
422 18, 52-60.
- 423 GERHARDT, H. 2008. VEGF and endothelial guidance in angiogenic sprouting. *Organogenesis*, 4, 241-  
424 6.
- 425 LIU, J., BRESSAN, M., HASSEL, D., HUISKEN, J., STAUDT, D., KIKUCHI, K., POSS, K. D., MIKAWA, T. &  
426 STAINIER, D. Y. 2010. A dual role for ErbB2 signaling in cardiac trabeculation. *Development*,  
427 137, 3867-75.
- 428 LAI, D., LIU, X. F., FORRAI, A., WOLSTEIN, O., MICHALICEK, J., AHMED, I., GARRATT, A. N.,  
429 BIRCHMEIER, C., ZHOU, M., HARTLEY, L., ROBB, L., FENELEY, M. P., FATKIN, D. & HARVEY, R.  
430 P. 2010. Neuregulin 1 Sustains the Gene Regulatory Network in Both Trabecular and  
431 Nontrabecular Myocardium. *Circulation Research*, 107, 715-U74.
- 432 PESHKOVSKY, C., TOTONG, R. & YELON, D. 2011. Dependence of cardiac trabeculation on neuregulin  
433 signaling and blood flow in zebrafish. *Dev Dyn*, 240, 446-56.
- 434 ROY, S., HSIUNG, F. & KORNBERG, T. B. 2011. Specificity of *Drosophila* cytonemes for distinct  
435 signaling pathways. *Science*, 332, 354-8.
- 436 HOLZER, T., LIFFERS, K., RAHM, K., TRAGESER, B., OZBEK, S. & GRADL, D. 2012. Live imaging of active  
437 fluorophore labelled Wnt proteins. *FEBS Lett*, 586, 1638-44.
- 438 SANDERS, T. A., LLAGOSTERA, E. & BARNA, M. 2013. Specialized filopodia direct long-range transport  
439 of SHH during vertebrate tissue patterning. *Nature*, 497, 628-32.
- 440 CHNG, S. C., HO, L., TIAN, J. & REVERSADE, B. 2013. ELABELA: a hormone essential for heart  
441 development signals via the apelin receptor. *Dev Cell*, 27, 672-80.
- 442 FIERRO-GONZALEZ, J. C., WHITE, M. D., SILVA, J. C. & PLACHTA, N. 2013. Cadherin-dependent  
443 filopodia control preimplantation embryo compaction. *Nat Cell Biol*, 15, 1424-33.
- 444 STAUDT, D. W., LIU, J., THORN, K. S., STUURMAN, N., LIEBLING, M. & STAINIER, D. Y. 2014. High-  
445 resolution imaging of cardiomyocyte behavior reveals two distinct steps in ventricular  
446 trabeculation. *Development*, 141, 585-93.
- 447 REGOT, S., HUGHEY, J. J., BAJAR, B. T., CARRASCO, S. & COVERT, M. W. 2014. High-sensitivity  
448 measurements of multiple kinase activities in live single cells. *Cell*, 157, 1724-34.
- 449 LUZ, M., SPANNL-MULLER, S., OZHAN, G., KAGERMEIER-SCHENK, B., RHINN, M., WEIDINGER, G. &  
450 BRAND, M. 2014. Dynamic association with donor cell filopodia and lipid-modification are  
451 essential features of Wnt8a during patterning of the zebrafish neuroectoderm. *PLoS One*, 9,  
452 e84922.
- 453 HELKER, C. S., SCHUERMANN, A., POLLMANN, C., CHNG, S. C., KIEFER, F., REVERSADE, B. & HERZOG,  
454 W. 2015. The hormonal peptide Elabela guides angioblasts to the midline during  
455 vasculogenesis. *Elife*, 4.
- 456 STANGANELLO, E., HAGEMANN, A. I., MATTES, B., SINNER, C., MEYEN, D., WEBER, S., SCHUG, A., RAZ,  
457 E. & SCHOLPP, S. 2015. Filopodia-based Wnt transport during vertebrate tissue patterning.  
458 *Nat Commun*, 6, 5846.
- 459 SAGAR, PROLS, F., WIEGREFFE, C. & SCAAL, M. 2015. Communication between distant epithelial cells  
460 by filopodia-like protrusions during embryonic development. *Development*, 142, 665-671.

- 461 D'AMATO, G., LUXAN, G., DEL MONTE-NIETO, G., MARTINEZ-POVEDA, B., TORROJA, C., WALTER, W.,  
462 BOCHTER, M. S., BENEDITO, R., COLE, S., MARTINEZ, F., HADJANTONAKIS, A. K., UEMURA, A.,  
463 JIMENEZ-BORREGUERO, L. J. & DE LA POMPA, J. L. 2016. Sequential Notch activation  
464 regulates ventricular chamber development. *Nat Cell Biol*, 18, 7-20.
- 465 JIMENEZ-AMILBURU, V., RASOULI, S. J., STAUDT, D. W., NAKAJIMA, H., CHIBA, A., MOCHIZUKI, N. &  
466 STAINIER, D. Y. R. 2016. In Vivo Visualization of Cardiomyocyte Apicobasal Polarity Reveals  
467 Epithelial to Mesenchymal-like Transition during Cardiac Trabeculation. *Cell Rep*, 17, 2687-  
468 2699.
- 469 HAN, P., BLOOMEKATZ, J., REN, J., ZHANG, R., GRINSTEIN, J. D., ZHAO, L., BURNS, C. G., BURNS, C. E.,  
470 ANDERSON, R. M. & CHI, N. C. 2016. Coordinating cardiomyocyte interactions to direct  
471 ventricular chamber morphogenesis. *Nature*, 534, 700-4.
- 472 RASOULI, S. J. & STAINIER, D. Y. R. 2017. Regulation of cardiomyocyte behavior in zebrafish  
473 trabeculation by Neuregulin 2a signaling. *Nat Commun*, 8, 15281.
- 474 ROTTNER, K., FAIX, J., BOGDAN, S., LINDER, S. & KERKHOFF, E. 2017. Actin assembly mechanisms at a  
475 glance. *Journal of Cell Science*, 130, 3427-3435.
- 476 DE LA COVA, C., TOWNLEY, R., REGOT, S. & GREENWALD, I. 2017. A Real-Time Biosensor for ERK  
477 Activity Reveals Signaling Dynamics during *C. elegans* Cell Fate Specification. *Dev Cell*, 42,  
478 542-553 e4.
- 479 WEE, P. & WANG, Z. 2017. Epidermal Growth Factor Receptor Cell Proliferation Signaling Pathways.  
480 *Cancers (Basel)*, 9.
- 481 DEL MONTE-NIETO, G., RAMIALISON, M., ADAM, A. A. S., WU, B., AHARONOV, A., D'UVA, G.,  
482 BOURKE, L. M., PITULESCU, M. E., CHEN, H., DE LA POMPA, J. L., SHOU, W., ADAMS, R. H.,  
483 HARTEN, S. K., TZAHOR, E., ZHOU, B. & HARVEY, R. P. 2018. Control of cardiac jelly dynamics  
484 by NOTCH1 and NRG1 defines the building plan for trabeculation. *Nature*, 557, 439-445.
- 485 SANDIREDDY, R., CIBI, D. M., GUPTA, P., SINGH, A., TEE, N., UEMURA, A., EPSTEIN, J. A. & SINGH, M.  
486 K. 2019. Semaphorin 3E/PlexinD1 signaling is required for cardiac ventricular compaction. *Jci*  
487 *Insight*, 4.
- 488 QU, X., HARMELINK, C. & BALDWIN, H. S. 2019. Tie2 regulates endocardial sprouting and myocardial  
489 trabeculation. *JCI Insight*, 5.
- 490 HUANG, H., LIU, S. M. & KORNBERG, T. B. 2019. Glutamate signaling at cytoneme synapses. *Science*,  
491 363, 948-+.
- 492 DI MARCO, B., CROUCH, E. E., SHAH, B., DUMAN, C., PAREDES, M. F., DE ALMODOVAR, C. R., HUANG,  
493 E. J. & ALFONSO, J. 2020. Reciprocal Interaction between Vascular Filopodia and Neural Stem  
494 Cells Shapes Neurogenesis in the Ventral Telencephalon. *Cell Reports*, 33.
- 495 HELKER, C. S., EBERLEIN, J., WILHELM, K., SUGINO, T., MALCHOW, J., SCHUERMANN, A.,  
496 BAUMEISTER, S., KWON, H. B., MAISCHEIN, H. M., POTENTE, M., HERZOG, W. & STAINIER, D.  
497 Y. 2020. Apelin signaling drives vascular endothelial cells toward a pro-angiogenic state. *Elife*,  
498 9.
- 499 PRIYA, R., ALLANKI, S., GENTILE, A., MANSINGH, S., URIBE, V., MAISCHEIN, H. M. & STAINIER, D. Y. R.  
500 2020. Tension heterogeneity directs form and fate to pattern the myocardial wall. *Nature*,  
501 588, 130-134.
- 502 TABERNER, L., BANON, A. & ALSINA, B. 2020. Sensory Neuroblast Quiescence Depends on Vascular  
503 Cytoneme Contacts and Sensory Neuronal Differentiation Requires Initiation of Blood Flow.  
504 *Cell Rep*, 32, 107903.

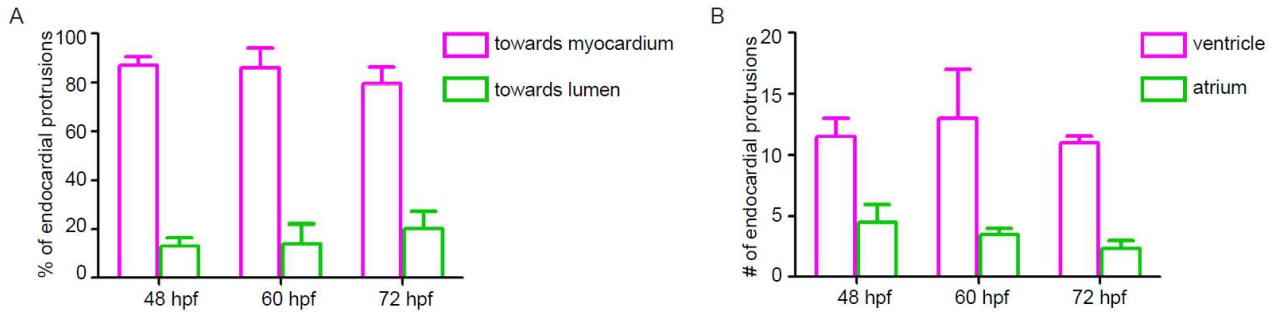

505 **Figure 1-figure supplement 1. Endocardial protrusions in the ventricle extend mainly towards the**  
506 **myocardium. (A)** Quantification of the direction of endocardial protrusions; most endocardial protrusions  
507 extend towards the myocardium. **(B)** Quantification of the average number of endocardial protrusions in the  
508 ventricle and atrium. n=9 in each group.

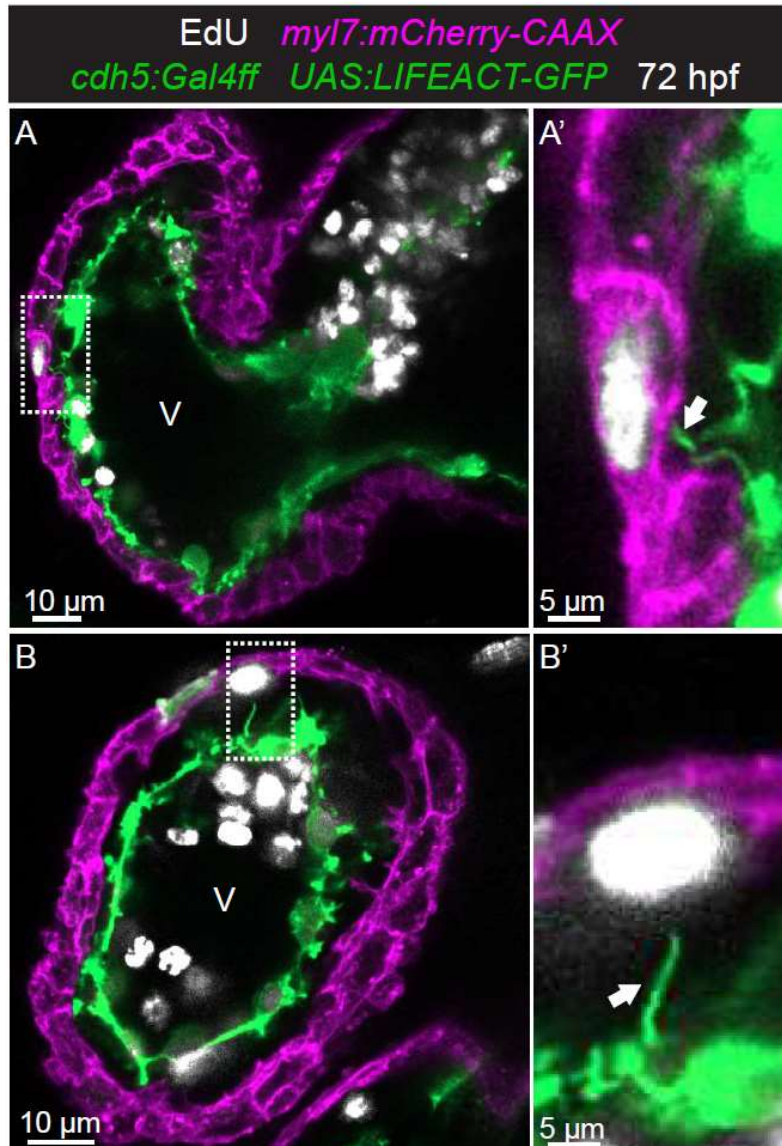

509 **Figure 1-figure supplement 2. Endocardial protrusions most often contact proliferating CMs.** (A-B) Confocal  
510 projection images of 72 hpf *Tg(myl7:mCherry-CAAX); Tg(cdh5:Gal4ff); Tg(UAS:LIFEACTION-GFP)* hearts after EdU  
511 labeling from 28 to 72 hpf. (A'-B') Arrows point to endocardial protrusions close to EdU<sup>+</sup> CMs (n=8). All images  
512 are ventral views, anterior to the top. V, ventricle.

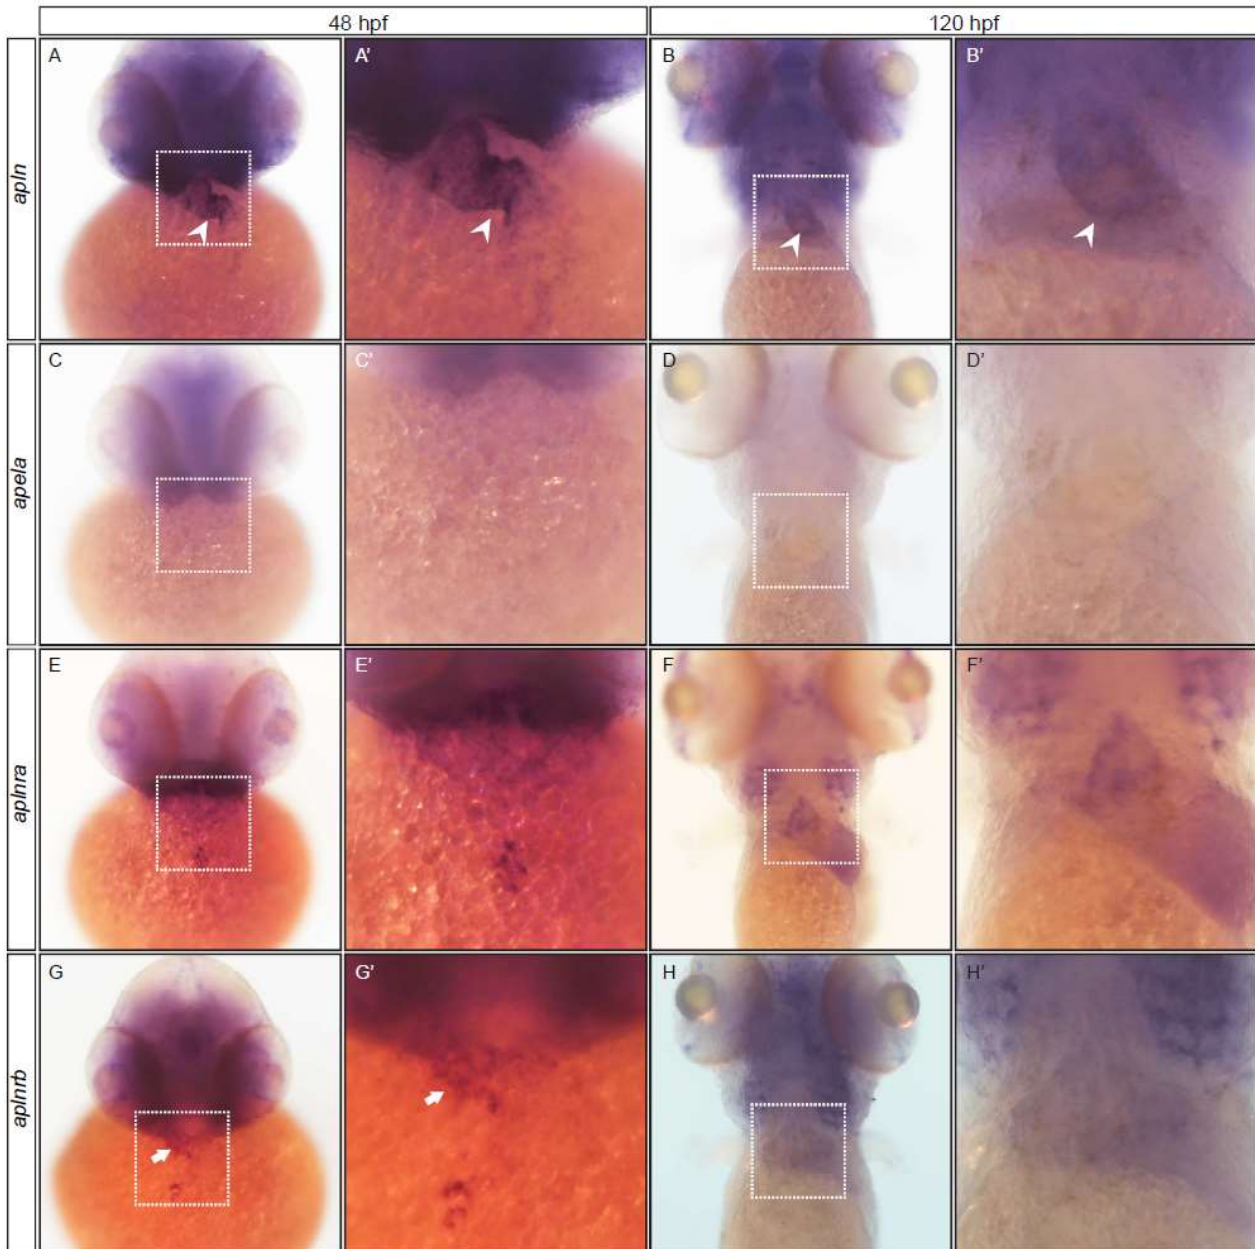

513 **Figure 3-figure supplement 1. Expression of Apelin signaling ligand and receptor genes by *in situ***  
514 **hybridization. (A-H) Expression of Apelin signaling ligand and receptor genes at 48 and 120 hpf. (A-B) *apln* is**  
515 **expressed in the developing heart (arrowheads). (C-D) *apela* expression is not detected in the developing**  
516 **heart. (E-F) *aplnra* expression is not detected in the developing heart. (G-H) *aplnrb* is expressed in the**  
517 **developing heart (arrows). White box, heart region.**

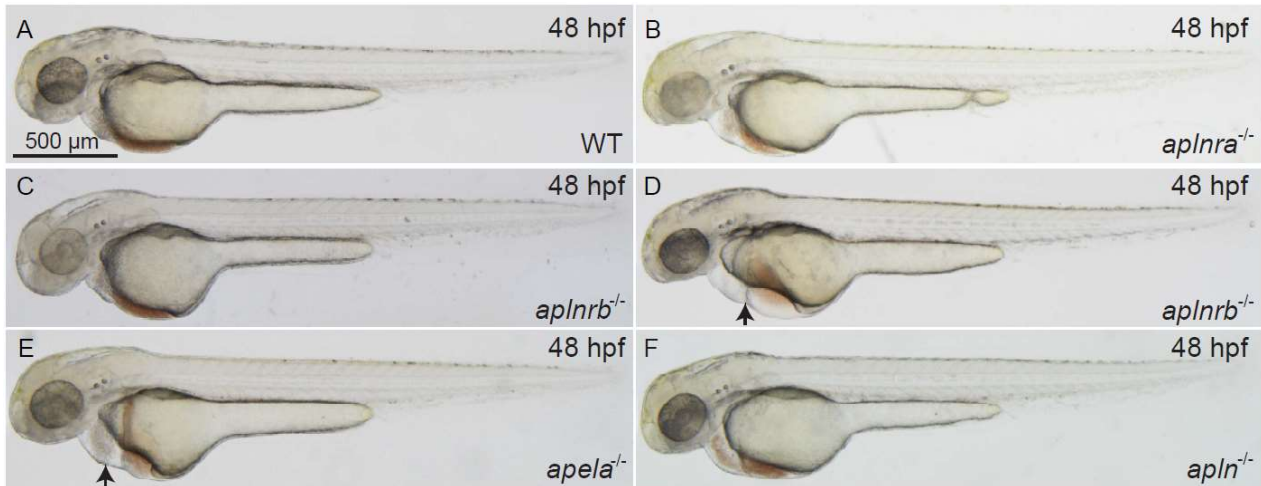

518 **Figure 4-figure supplement 1. Bright field pictures of *apl<sup>nra</sup>*, *apl<sup>nrb</sup>*, *apela* and *apl<sup>n</sup>* mutants. (A-F)**  
519 Brightfield pictures (lateral views) of 48 hpf wild-type (A), *apl<sup>nra</sup>* mutant (B), *apl<sup>nrb</sup>* mutant without pericardial  
520 edema (C), *apl<sup>nrb</sup>* mutant with pericardial edema (arrow) (D), *apela* mutant with pericardial edema (arrow) (E),  
521 and *apl<sup>n</sup>* mutant without pericardial edema (F).



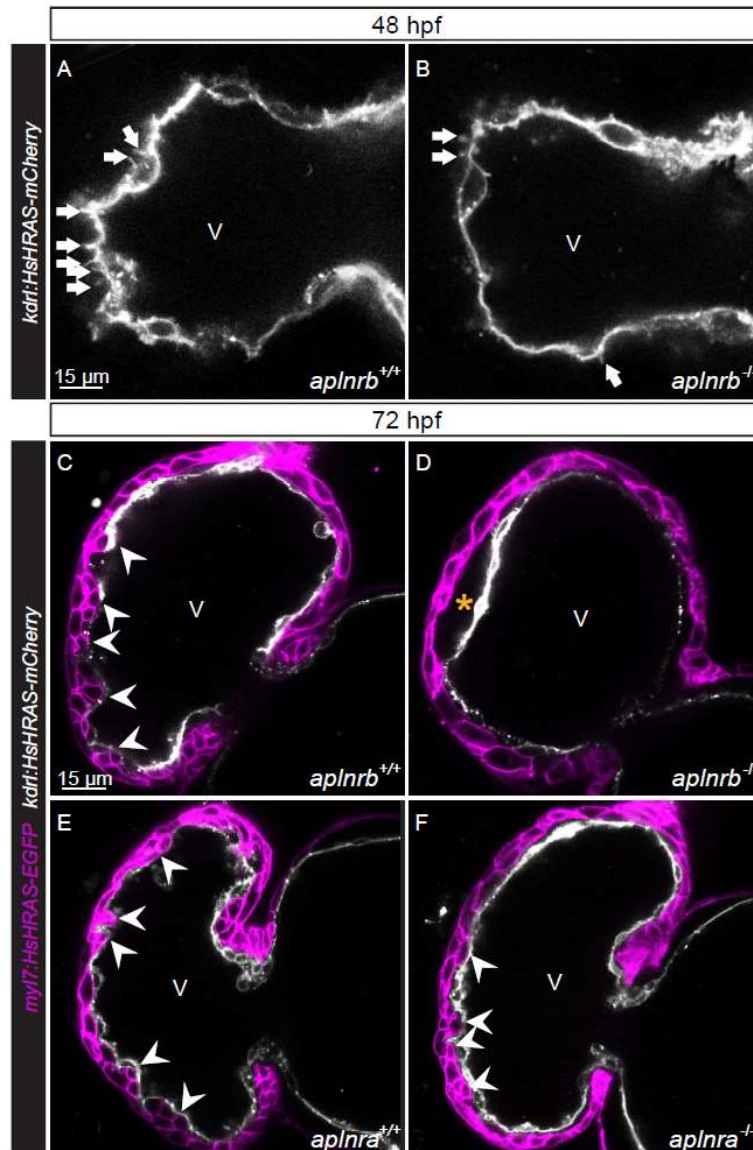

522 **Figure 4-figure supplement 2. *aplnr b* mutants exhibit reduced endocardial protrusion formation and**  
523 **trabeculation and *aplnr a* mutant exhibit a mild reduction in trabeculation. (A–F) Confocal projection images**  
524 **of the heart of *Tg(kdr1:HsHRAS-mCherry)* (A–B) and *Tg(myl7:HsHRAS-EGFP); Tg(kdr1:HsHRAS-mCherry)* (C–F)**  
525 **zebrafish at 48 (A–B) and 72 (C–F) hpf. (A–B) *aplnr b*<sup>-/-</sup> embryos exhibit fewer endocardial protrusions (arrows)**  
526 **compared with *aplnr b*<sup>+/+</sup> siblings (A) at 48 hpf. (C–D) *aplnr b*<sup>-/-</sup> larvae (D) exhibit reduced trabeculation**  
527 **(arrowheads) and thicker CJ (asterisk) compared with *aplnr b*<sup>+/+</sup> siblings (C) at 72 hpf. (E–F) *aplnr a*<sup>-/-</sup> larvae (F)**  
528 **exhibit a mild reduction of trabeculation compared with *aplnr a*<sup>+/+</sup> siblings (E) at 72 hpf. V, ventricle.**

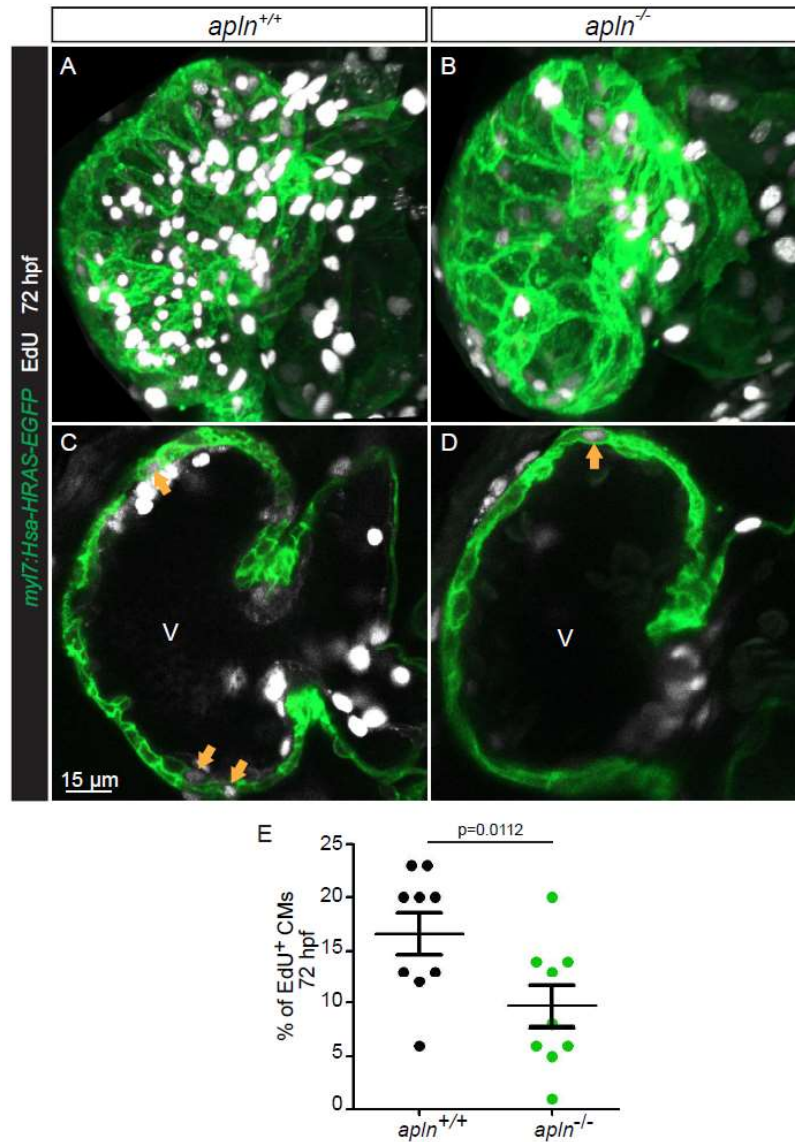

529 **Figure 4-figure supplement 3. Apelin signaling regulates CM proliferation in the ventricle. (A-D)** Confocal  
530 projection images of the heart of *Tg(myI7:HsHRAS-EGFP)* larvae at 72 hpf. **(A-B)** Maximum intensity projections  
531 of confocal images. **(C-D)** Mid-sagittal sections of A and B, respectively. *apl<sup>n-/-</sup>* larvae **(D)** exhibit fewer  
532 proliferating CMs (arrows) in the ventricle compared with *apl<sup>n+/+</sup>* siblings **(C)**. **(E)** Quantification of EdU<sup>+</sup> CMs in  
533 the ventricle of *apl<sup>n+/+</sup>* and *apl<sup>n-/-</sup>* siblings. V, ventricle. Data in graphs expressed as mean ± SEM.

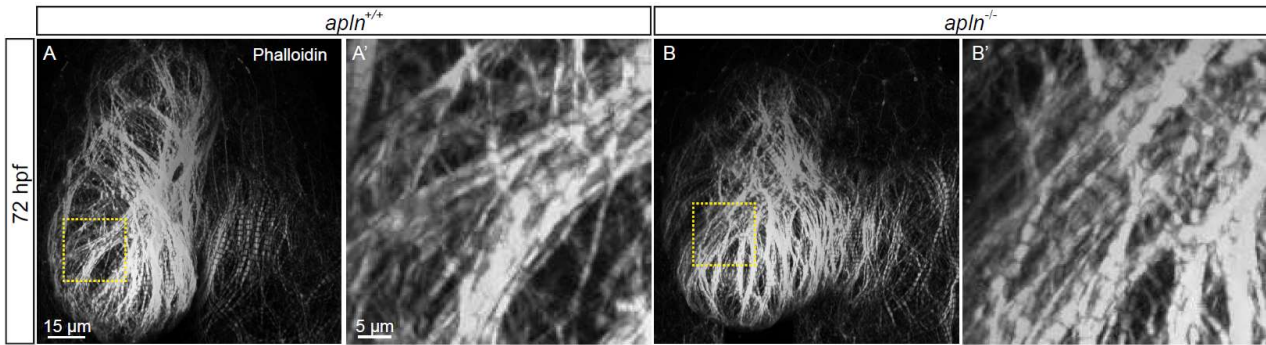

534 **Figure 4-figure supplement 4. Wild-type like heart function and sarcomere structure in *apl<sup>n-/-</sup>* larvae. (A-B)**  
535 Quantification of heart rate (A) and ejection fraction (B) of *apl<sup>n+/+</sup>* and *apl<sup>n-/-</sup>* siblings. (C-D) Confocal projection  
536 images. Maximum intensity projections of confocal images of the heart of 72 hpf larvae stained with  
537 Phalloidin. Sarcomere formation does not appear to be affected in *apl<sup>n-/-</sup>* larvae (C) compared with *apl<sup>n+/+</sup>*  
538 siblings (D) (*apl<sup>n+/+</sup>*, n=5; *apl<sup>n-/-</sup>*, n=4). V, ventricle.

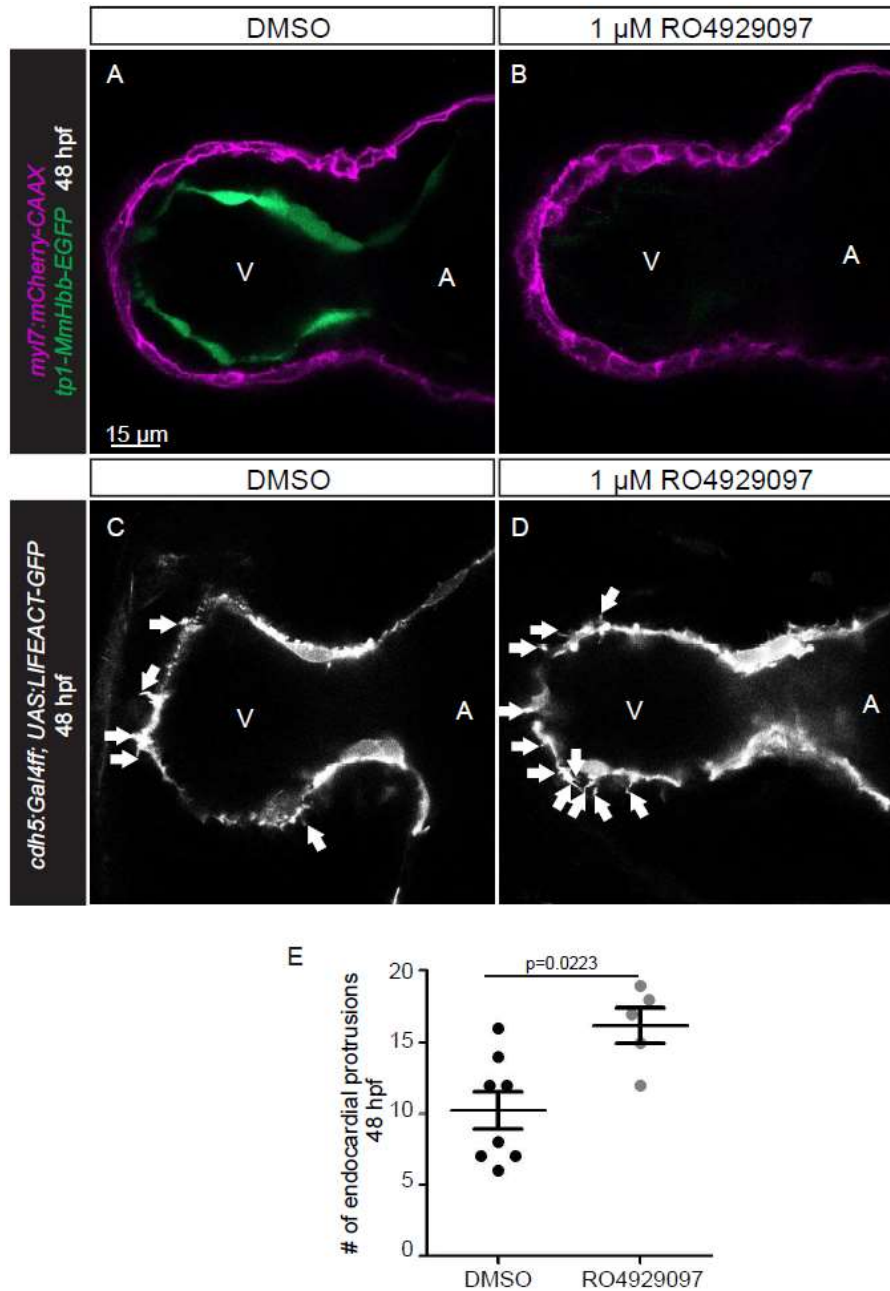

539 **Figure 4-figure supplement 5. Notch signaling represses endocardial protrusion formation. (A-D)** Confocal  
540 projection images of the heart of *Tg(myl7:mCherry-CAAX); Tg(tp1-MmHbb:EGFP)* (A-B) and *Tg(cdh5:Gal4ff);*  
541 *Tg(UAS:LIFEACT-GFP)* (C-D) embryos at 48 hpf. (A-B) Treatment with 1  $\mu$ M of the Notch inhibitor RO4929097  
542 from 24 to 48 hpf blocks the expression of the *Tg(tp1-MmHbb:EGFP)* Notch reporter in the endocardium. (C-D)  
543 Embryos treated with the Notch inhibitor exhibit more endocardial protrusions (arrows). (E) Quantification of  
544 the number of endocardial protrusions in the ventricle of DMSO and RO4929097 treated embryos at 48 hpf. All  
545 images are ventral views, anterior to the top. V, ventricle; A, atrium. Data in graphs expressed as mean  $\pm$  SEM.

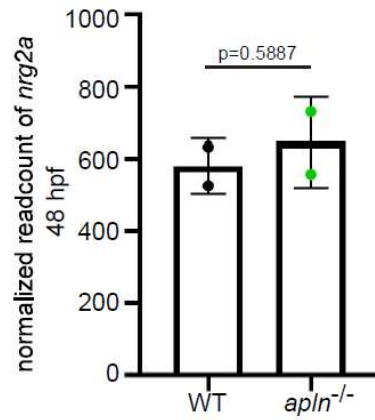

546 **Figure 5-figure supplement 1. *nrg2a* expression does not appear to be affected in *apl<sup>n</sup>* mutants. *nrg2a* mRNA**  
547 levels in extracted hearts from wild types and *apl<sup>n</sup>* mutants at 48 hpf (from RNA-seq). Data in graphs  
548 expressed as mean ± SEM.

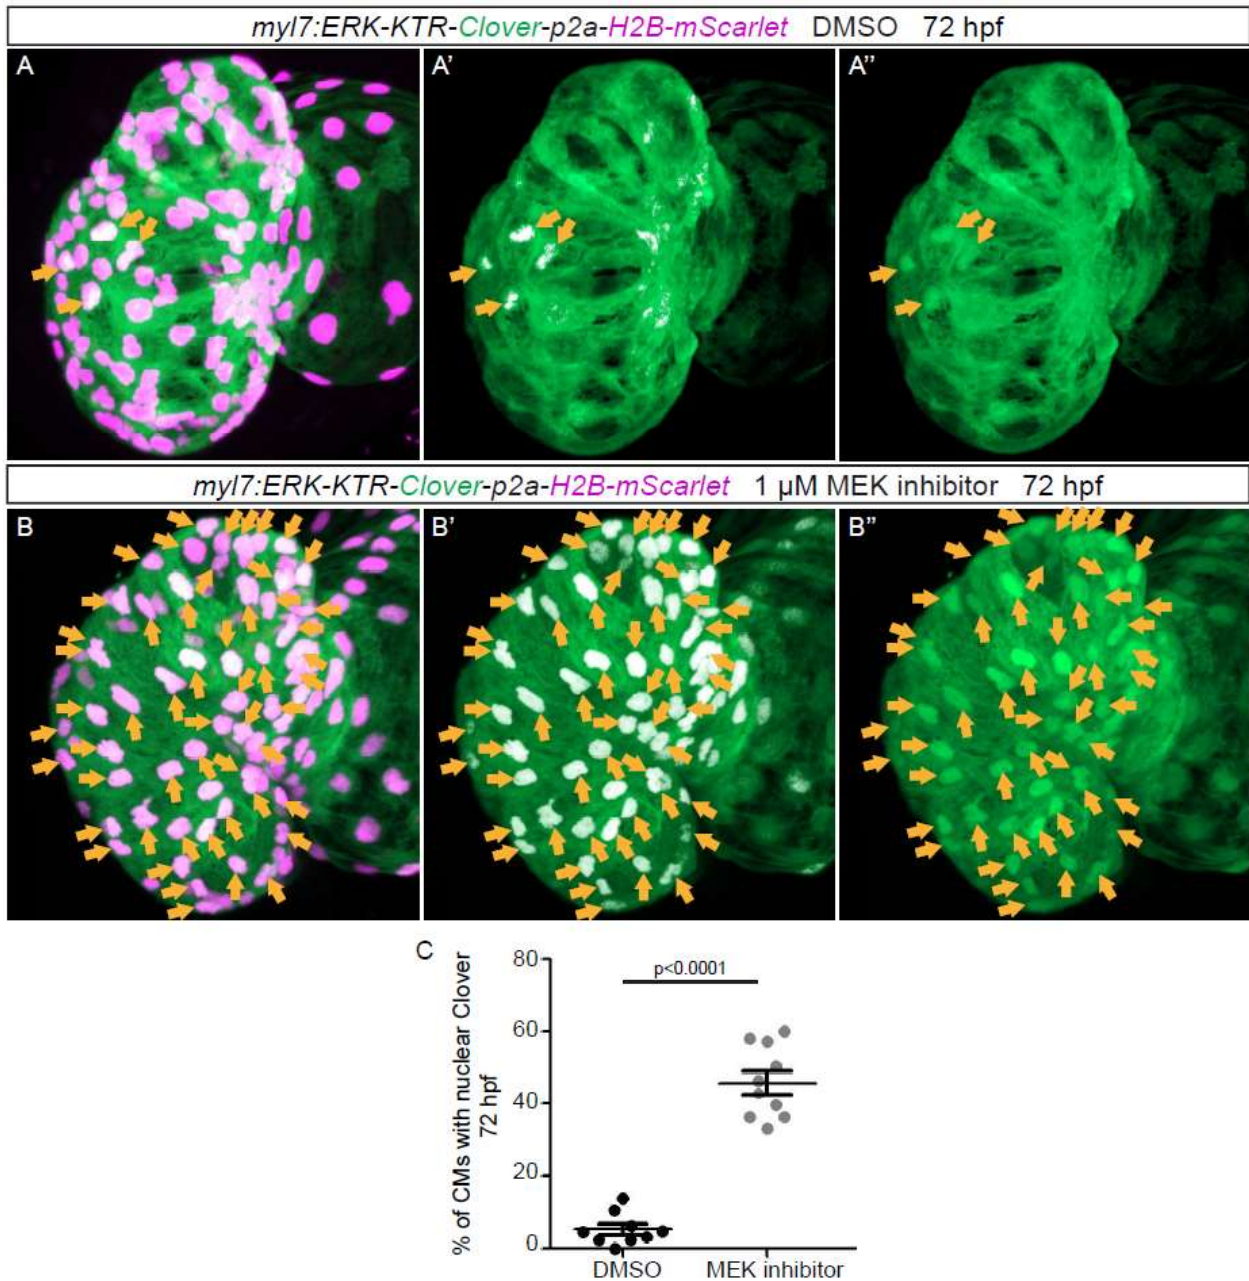

549 **Figure 6-figure supplement 1. Erk inhibitor represses the activity of Erk in the Erk reporter line. (A-B)**  
550 Confocal projection images. Maximum intensity projections of the heart of *Tg(myl7:ERK-KTR-Clover-p2a-H2B-*  
551 *mScarlet)* larvae at 72 hpf. **(B)** Larvae treated with the Erk inhibitor exhibit an increased number of CMs with  
552 inactive Erk signaling (arrows) compared with larvae treated with DMSO **(A)**. **(C)** Quantification of ventricular  
553 CMs with nuclear Clover. All images are ventral views, anterior to the top. V, ventricle. Data in graphs  
554 expressed as mean  $\pm$  SEM.

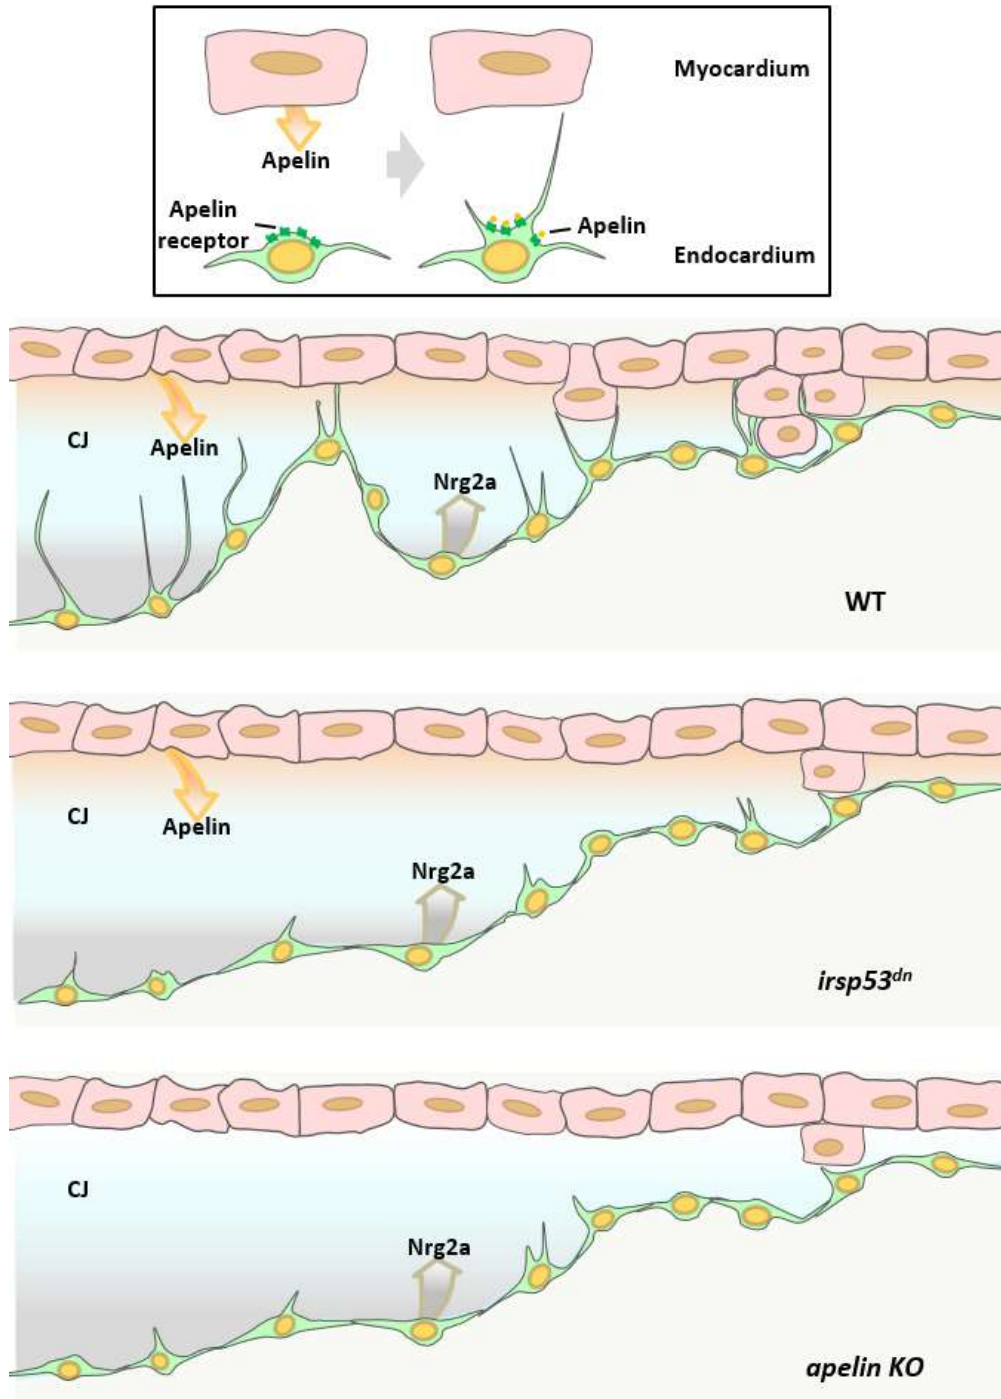

555 **Figure 6-figure supplement 2. Schematic model.** Schematic model depicts that manipulating the formation of  
556 endocardial protrusions results in cardiac trabeculation defects via mediating the function of Nrg/ErbB  
557 signaling.
